# Supplementary material
Source: PubMed Central journal article supplement (PMC1986577)

**CHEMISTRY**   
A EUROPEAN JOURNAL

Supporting Information

© Copyright Wiley-VCH Verlag GmbH & Co. KGaA, 69451 Weinheim, 2006

# **A Facile Method for Oxidation of Primary Alcohols to Carboxylic Acids and Its Application in Glycosaminoglycan Syntheses**

Lijun Huang, Nardos Teumelsan, Xuefei Huang\*

*Department of Chemistry, The University of Toledo, 2801 W. Bancroft Street, MS 602, Toledo, OH 43606, USA*

*Corresponding author: Tel: 1-419-530-1507; Fax: 1-419-530-4033;*

*Email: [xuefei.huang@utoledo.edu](mailto:xuefei.huang@utoledo.edu)*

## $^1\text{H}$ - and $^{13}\text{C}$ - NMR Spectra

$^1\text{H}$ -NMR (600 MHz,  $\text{CDCl}_3$ )

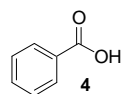

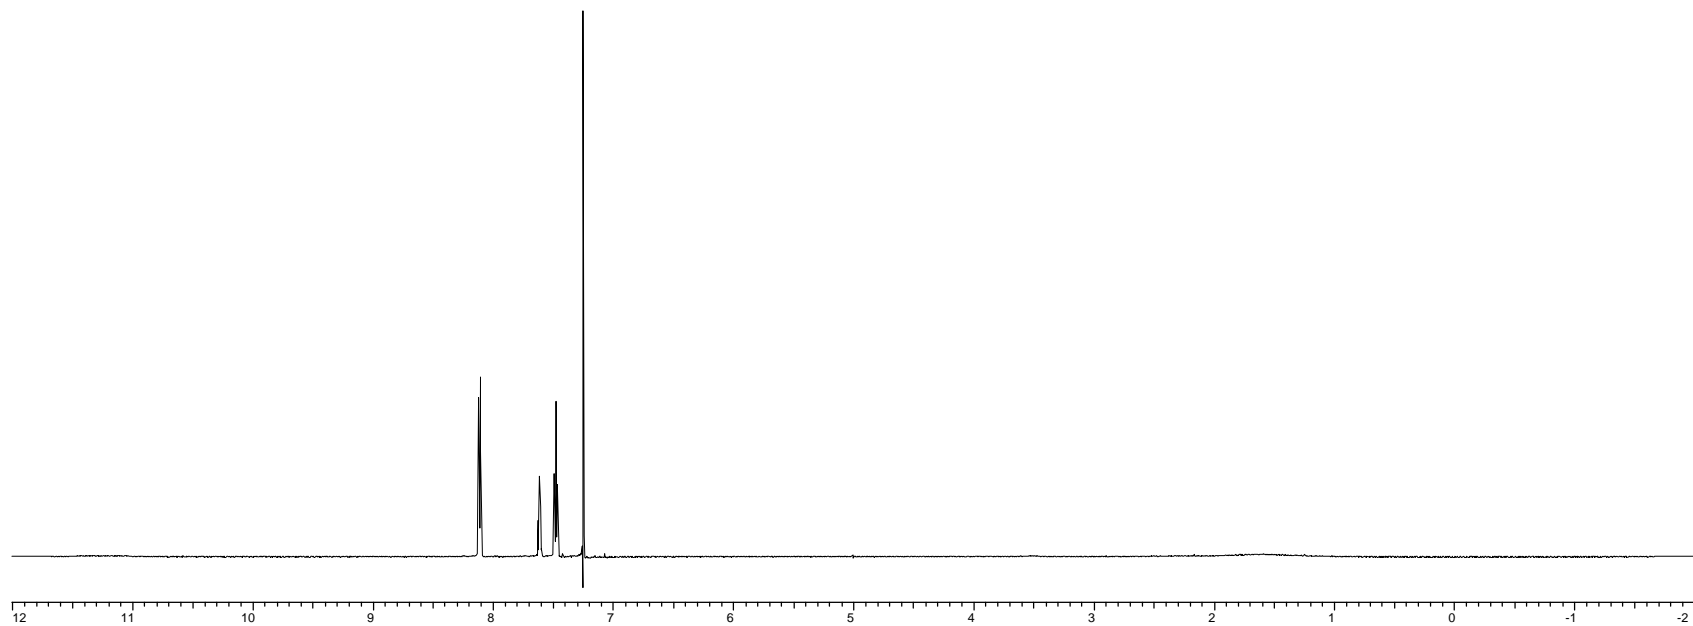

$^{13}\text{C}$ -NMR (100 MHz,  $\text{CDCl}_3$ )

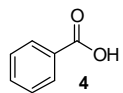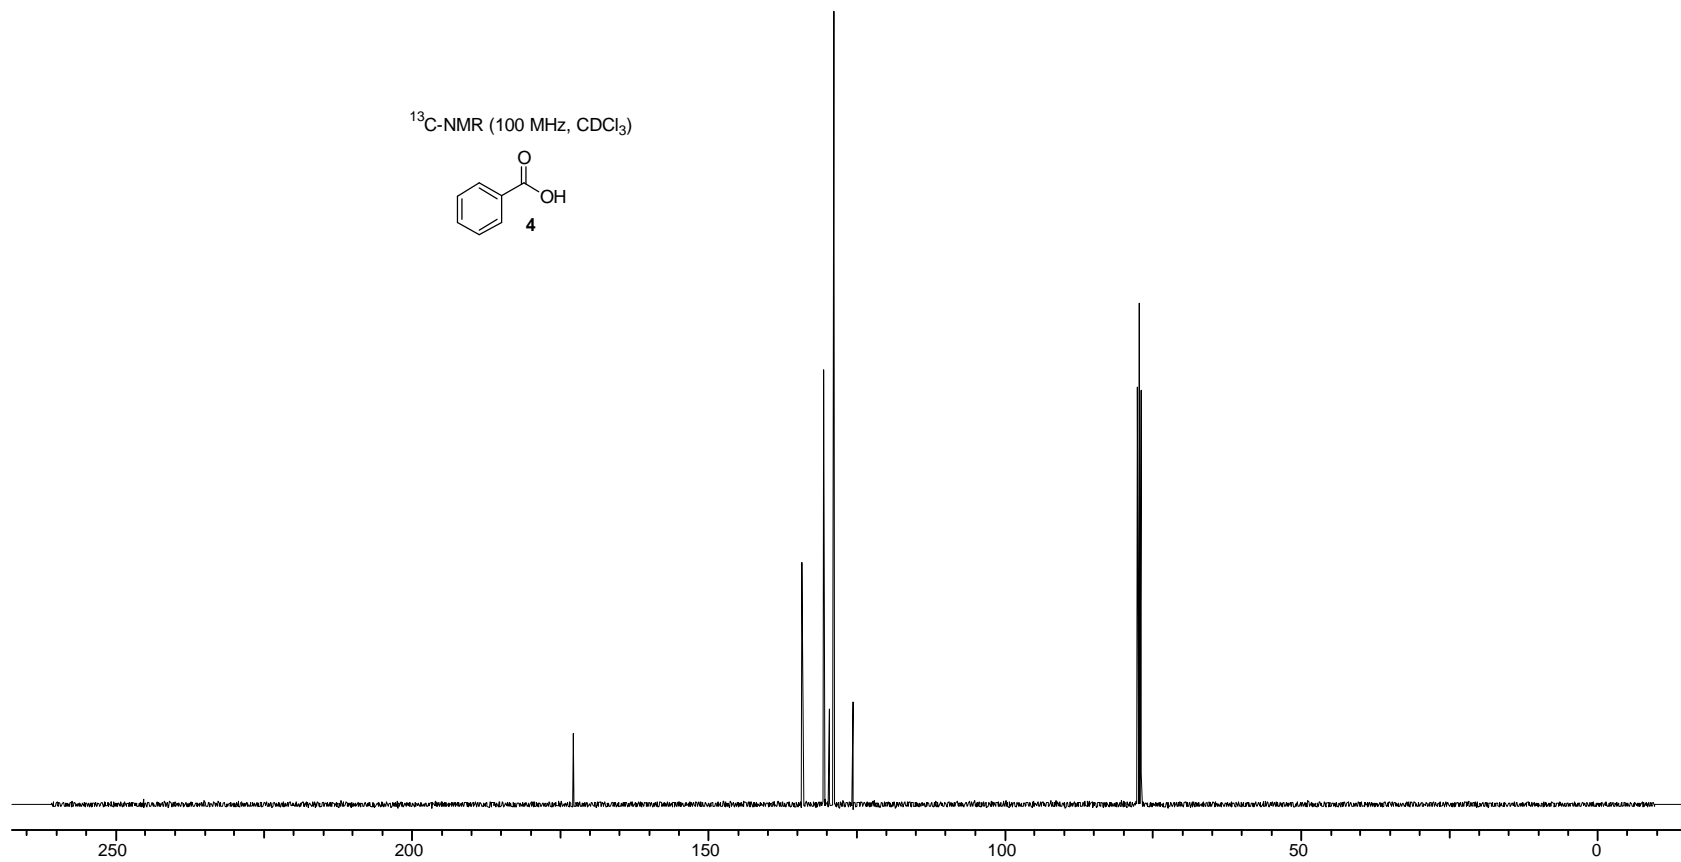

<sup>1</sup>H-NMR (600 MHz, CDCl<sub>3</sub>)

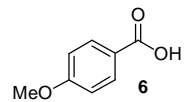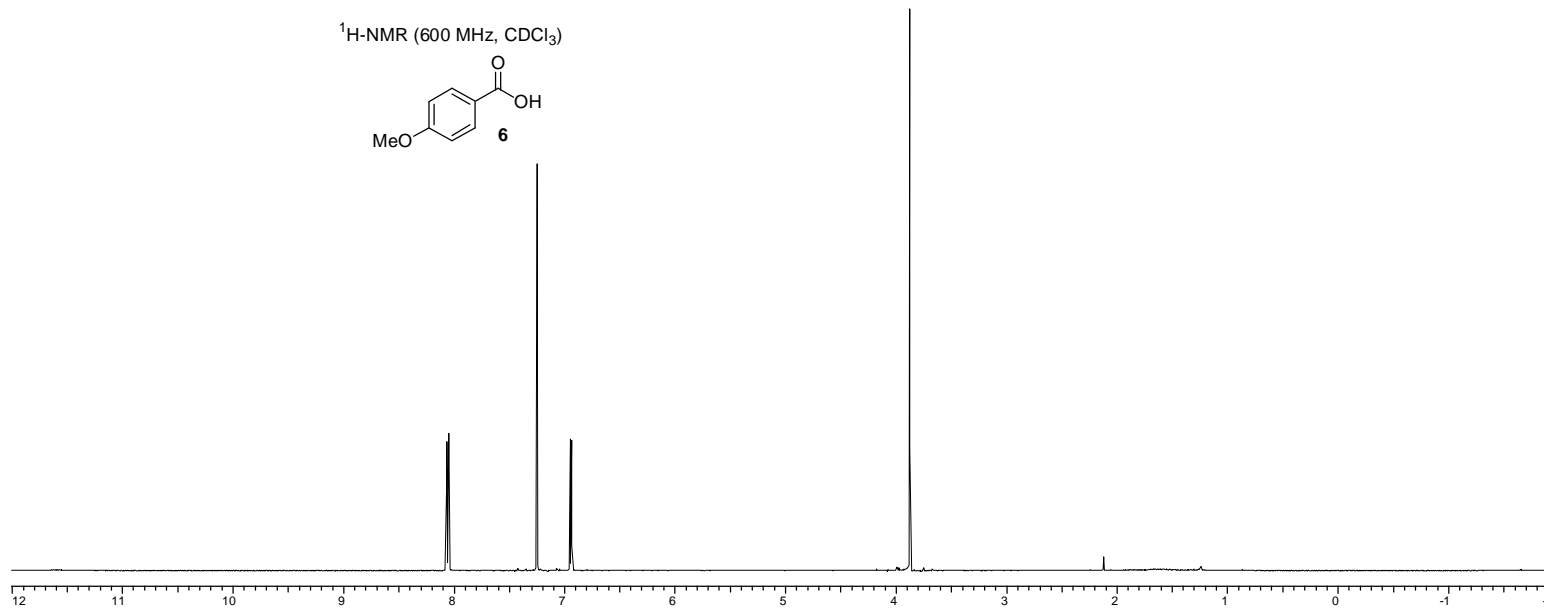

$^{13}\text{C-NMR}$  (100 MHz,  $\text{CDCl}_3$ )

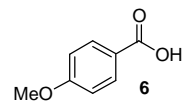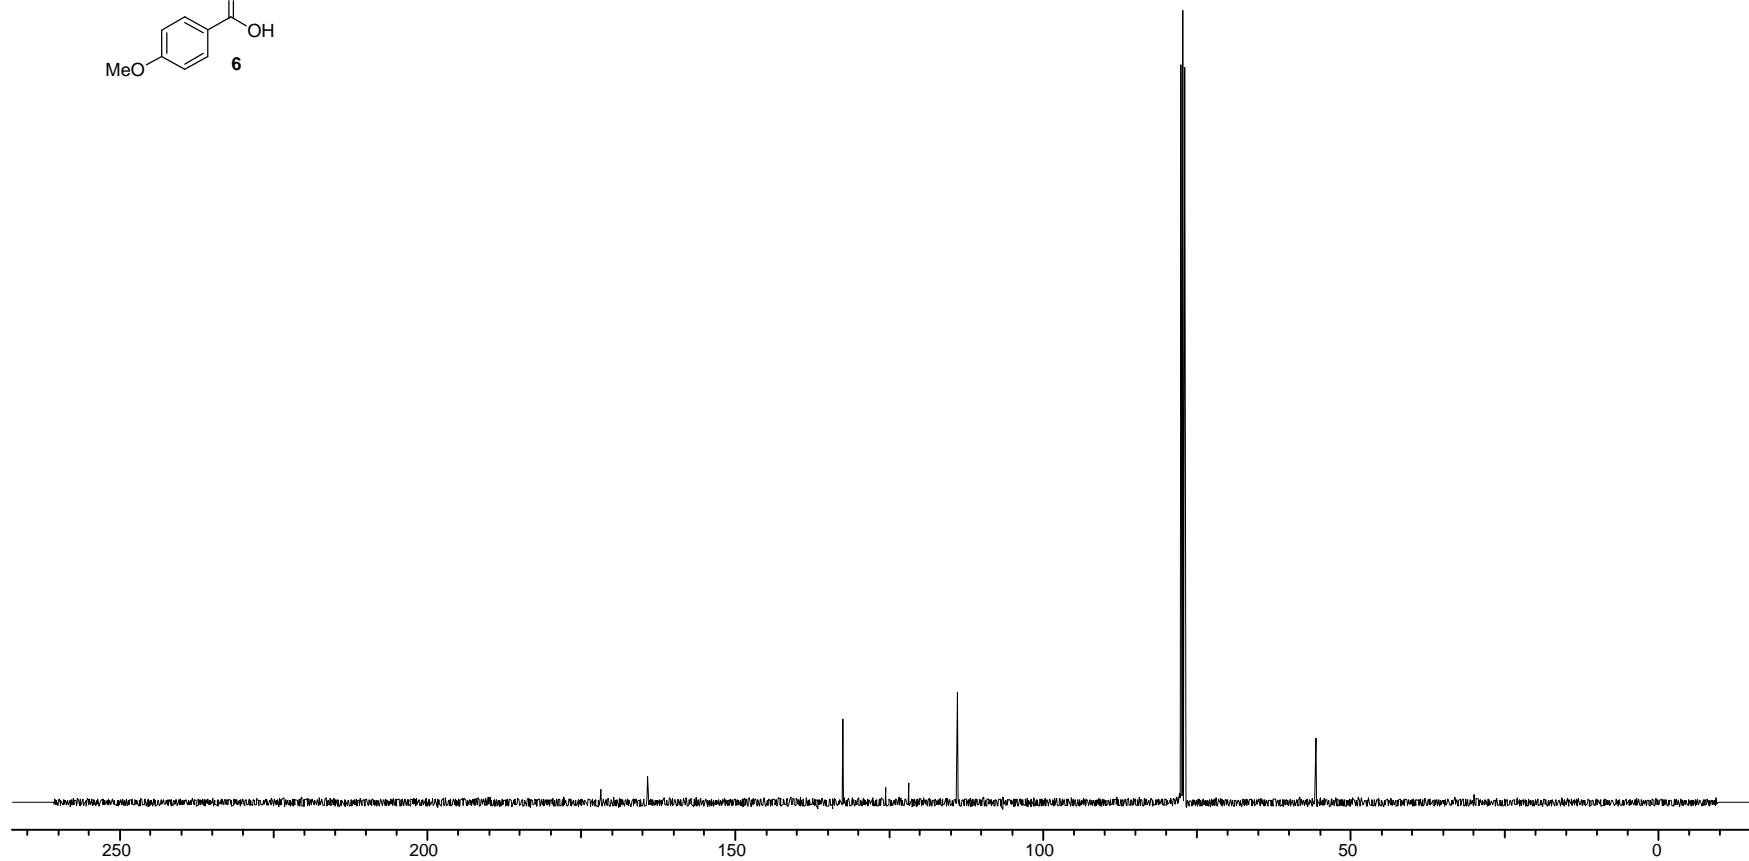





<sup>1</sup>H-NMR (400 MHz, CDCl<sub>3</sub>)

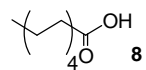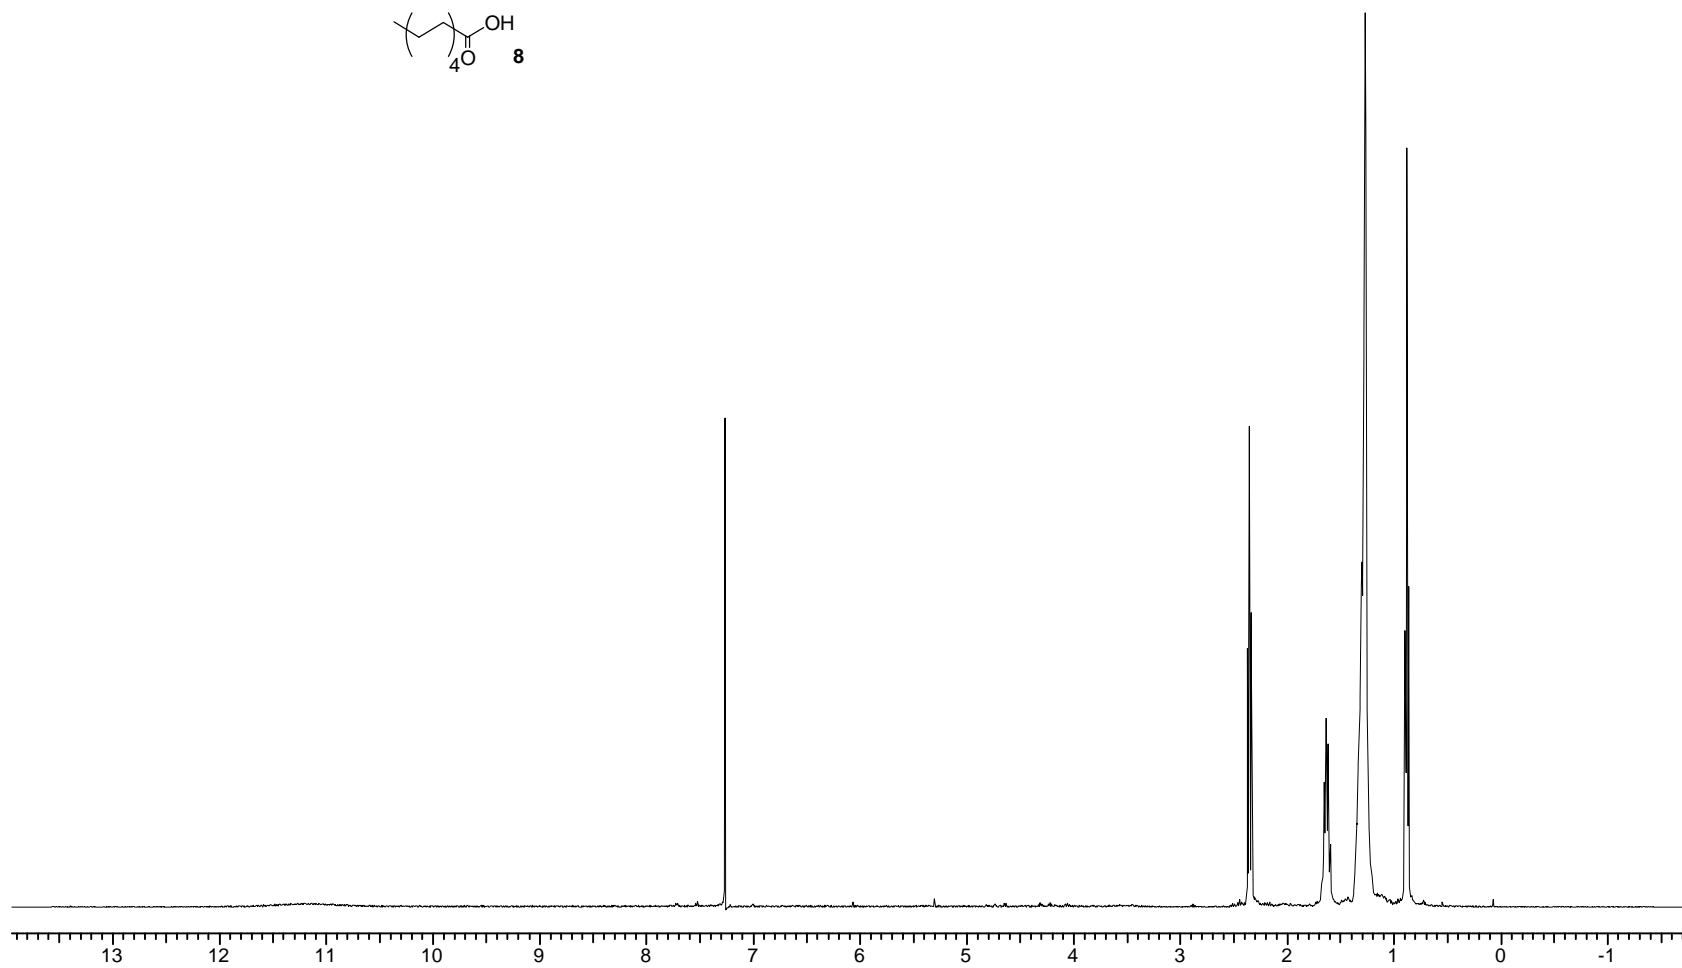

$^{13}\text{C}$ -NMR (100 MHz,  $\text{CDCl}_3$ )

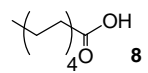

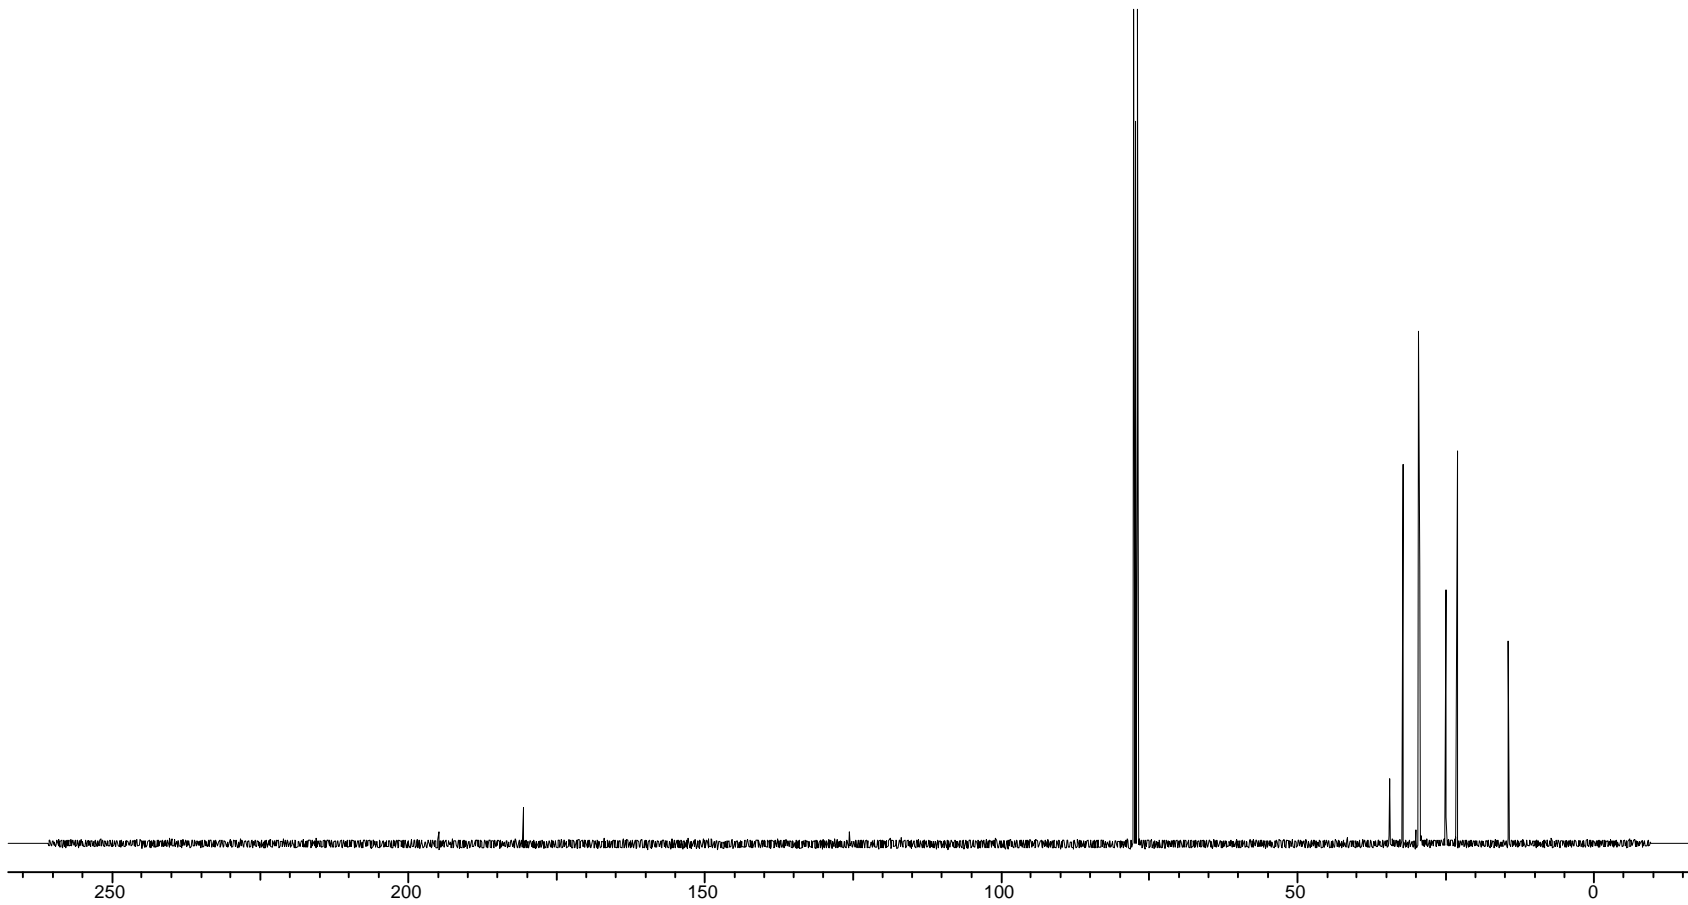

<sup>1</sup>H-NMR (600 MHz, CDCl<sub>3</sub>)

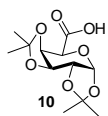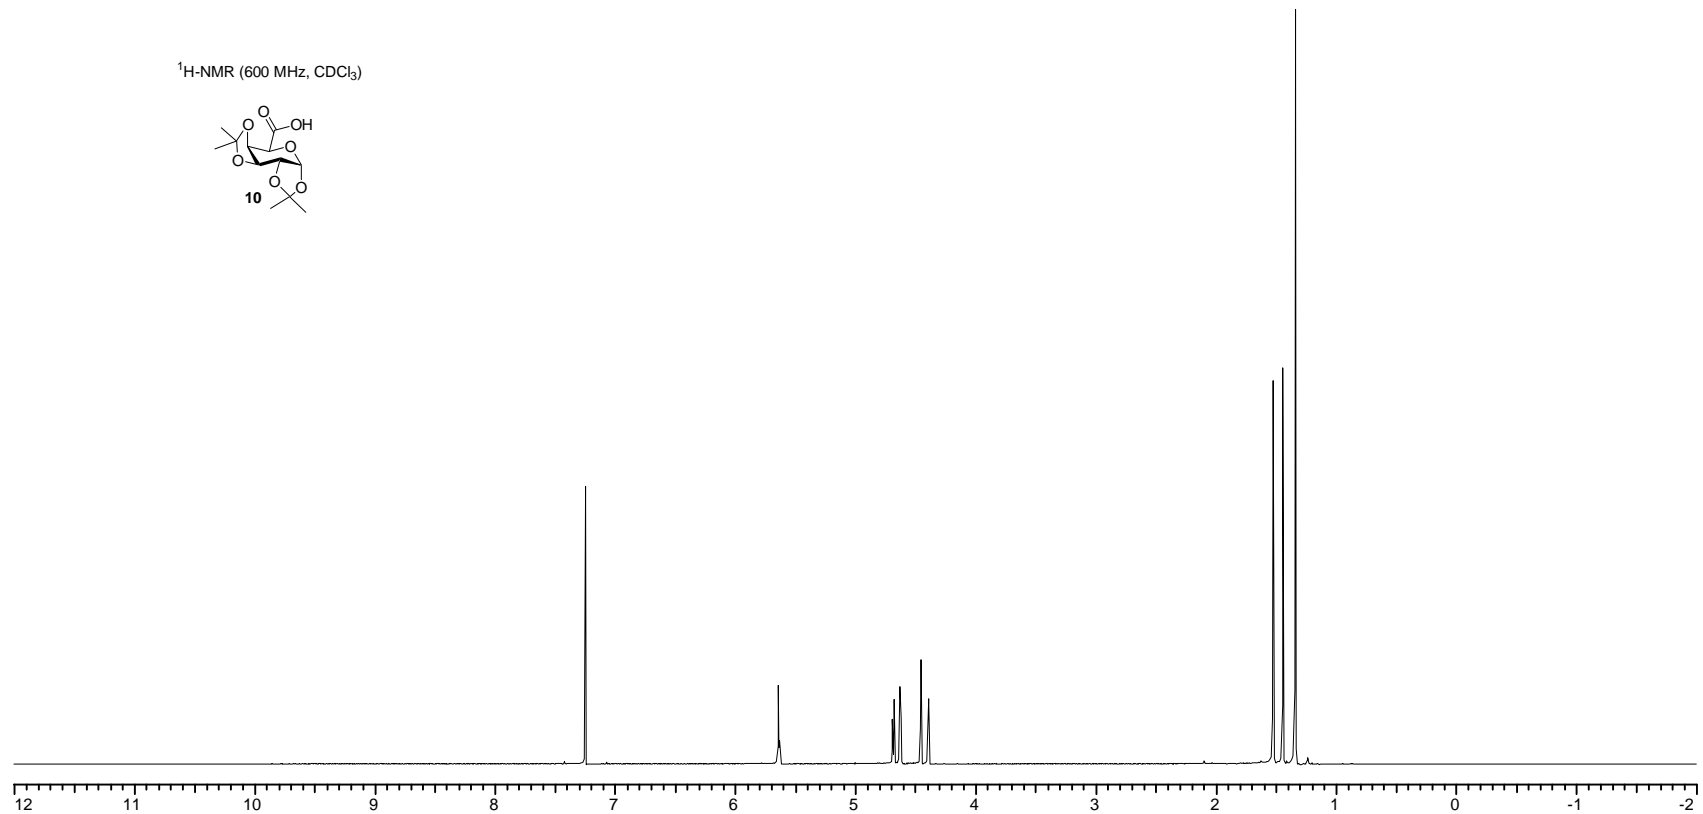



<sup>13</sup>C-NMR (100 MHz, CDCl<sub>3</sub>)

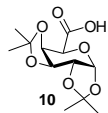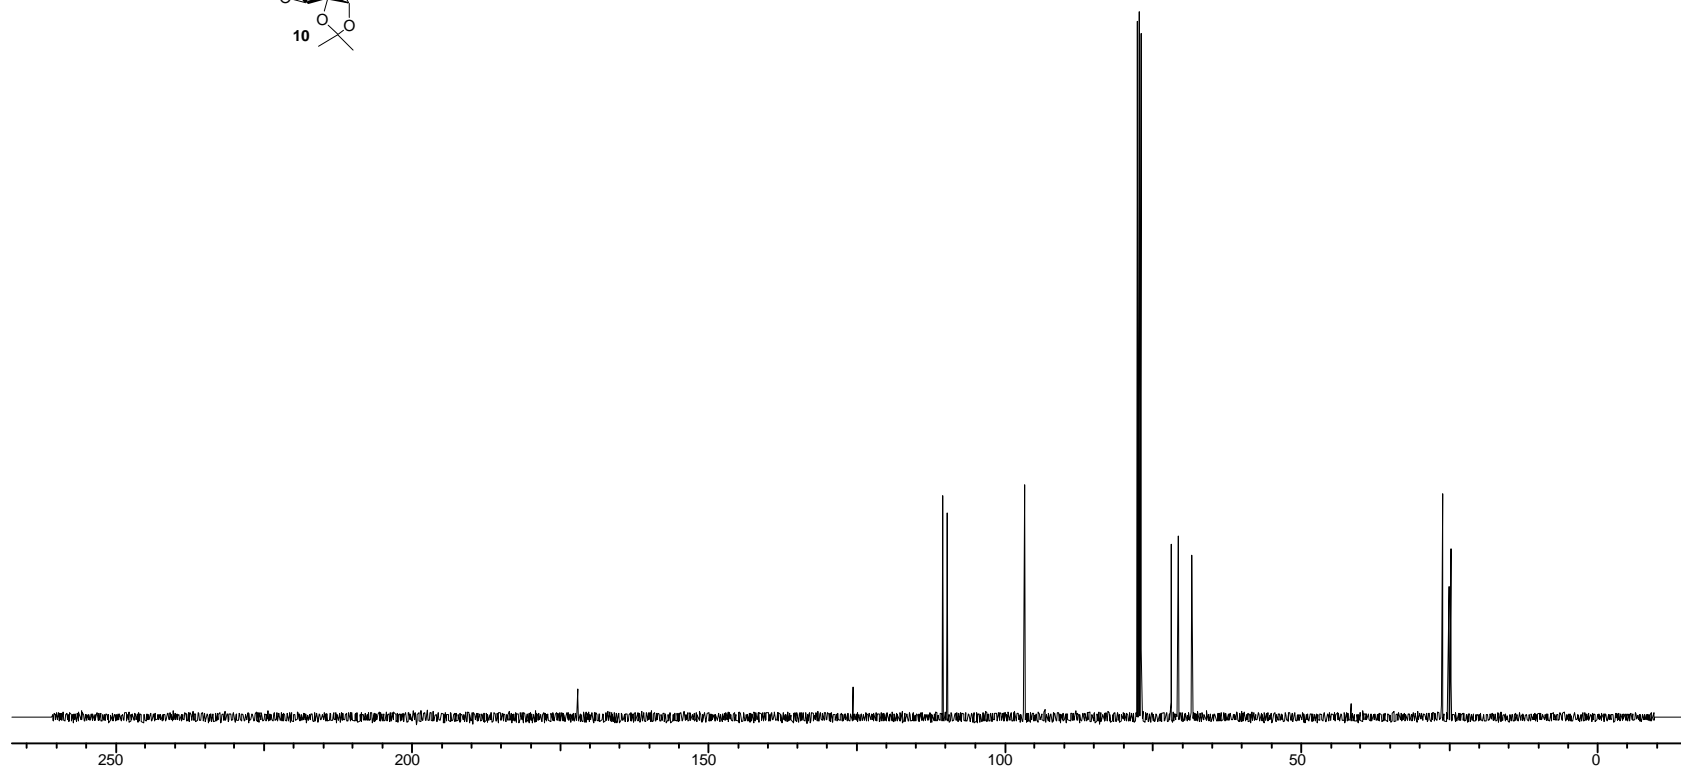

<sup>1</sup>H-NMR (400 MHz, CDCl<sub>3</sub>)

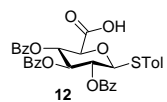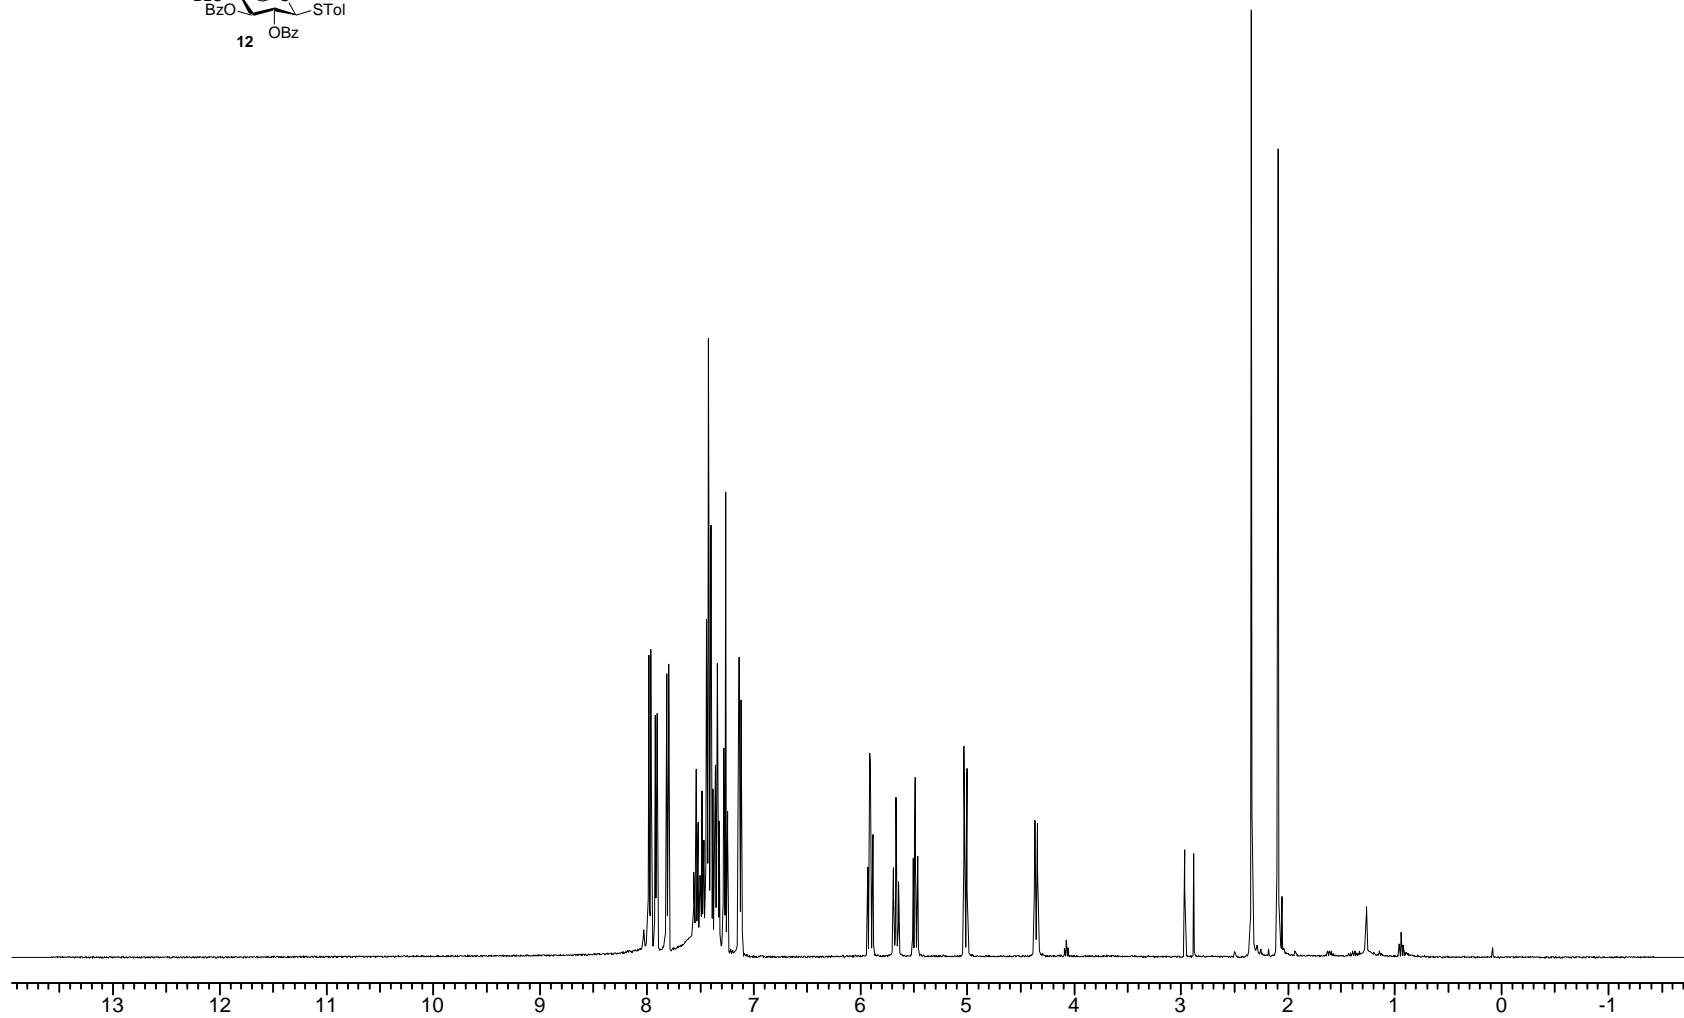

<sup>13</sup>C-NMR (100 MHz, CDCl<sub>3</sub>)

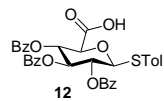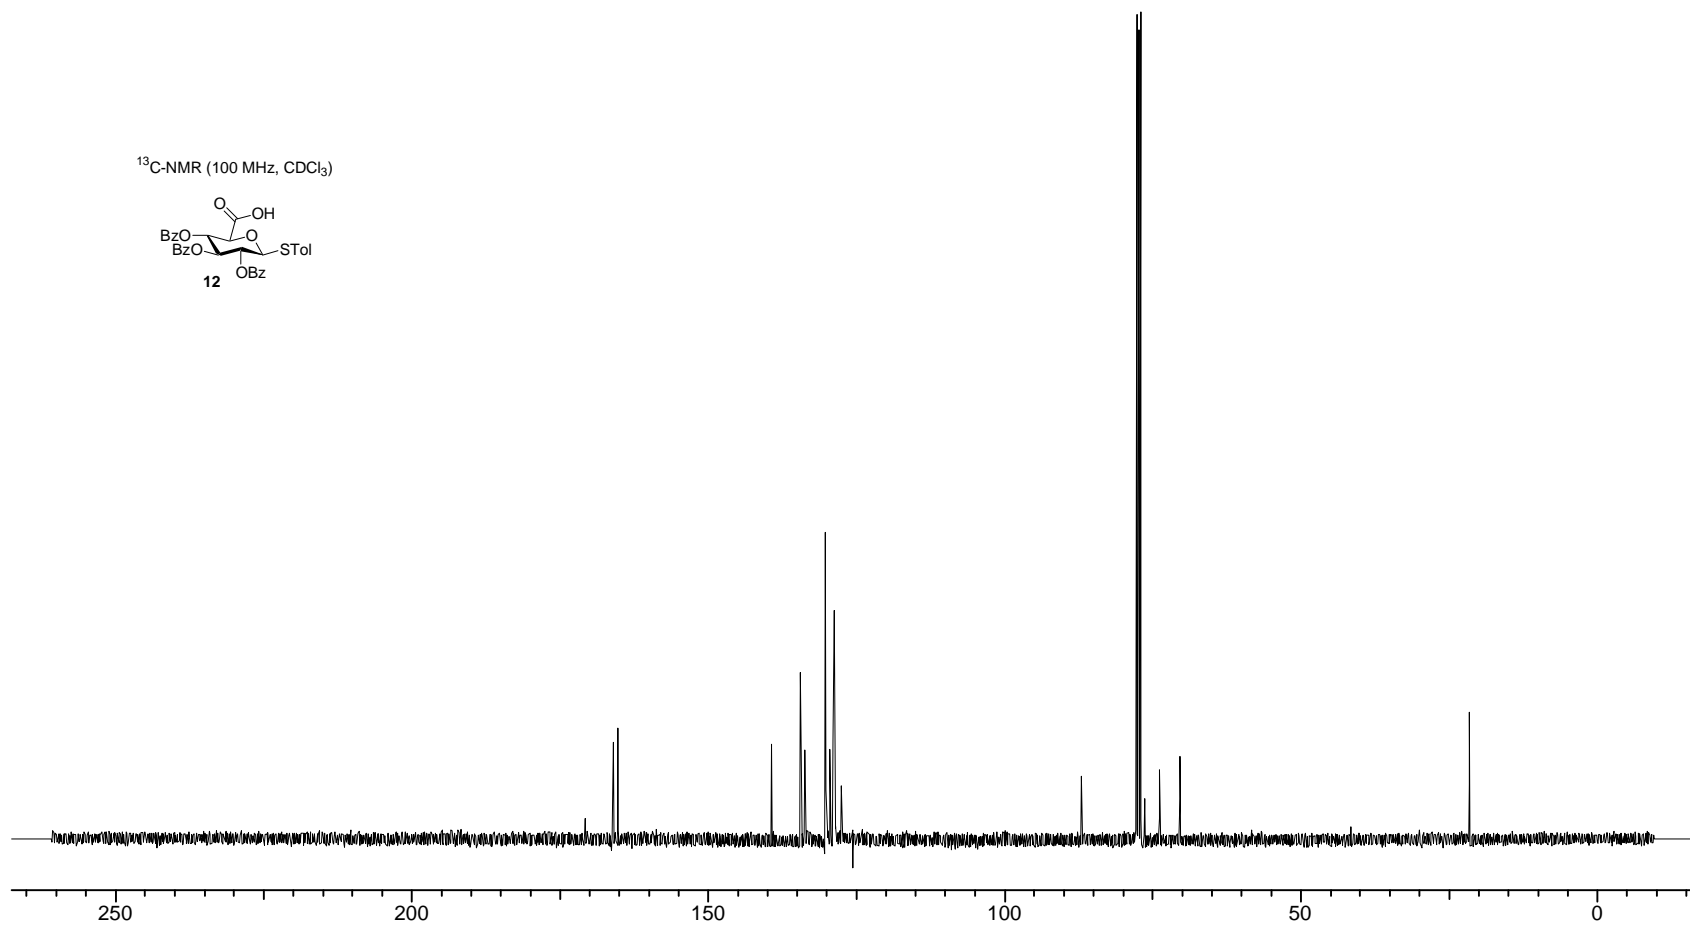



$^1\text{H-NMR}$  (400 MHz,  $\text{CDCl}_3$ )

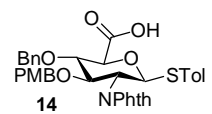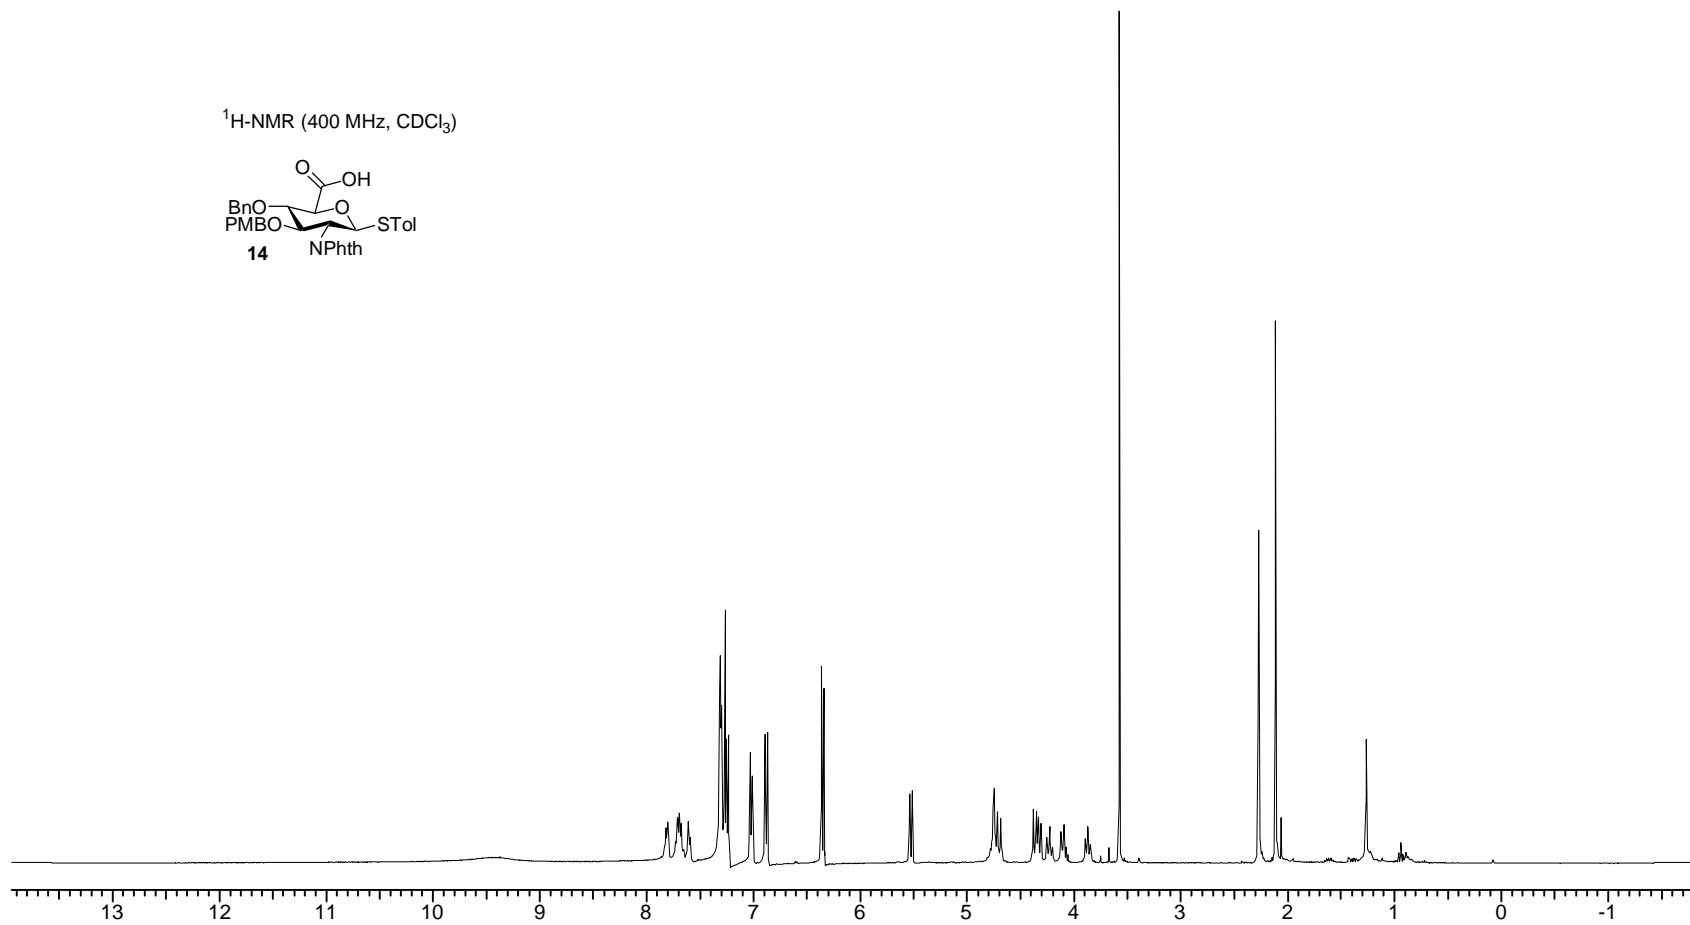



<sup>1</sup>H-NMR (400 MHz, CDCl<sub>3</sub>)

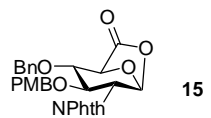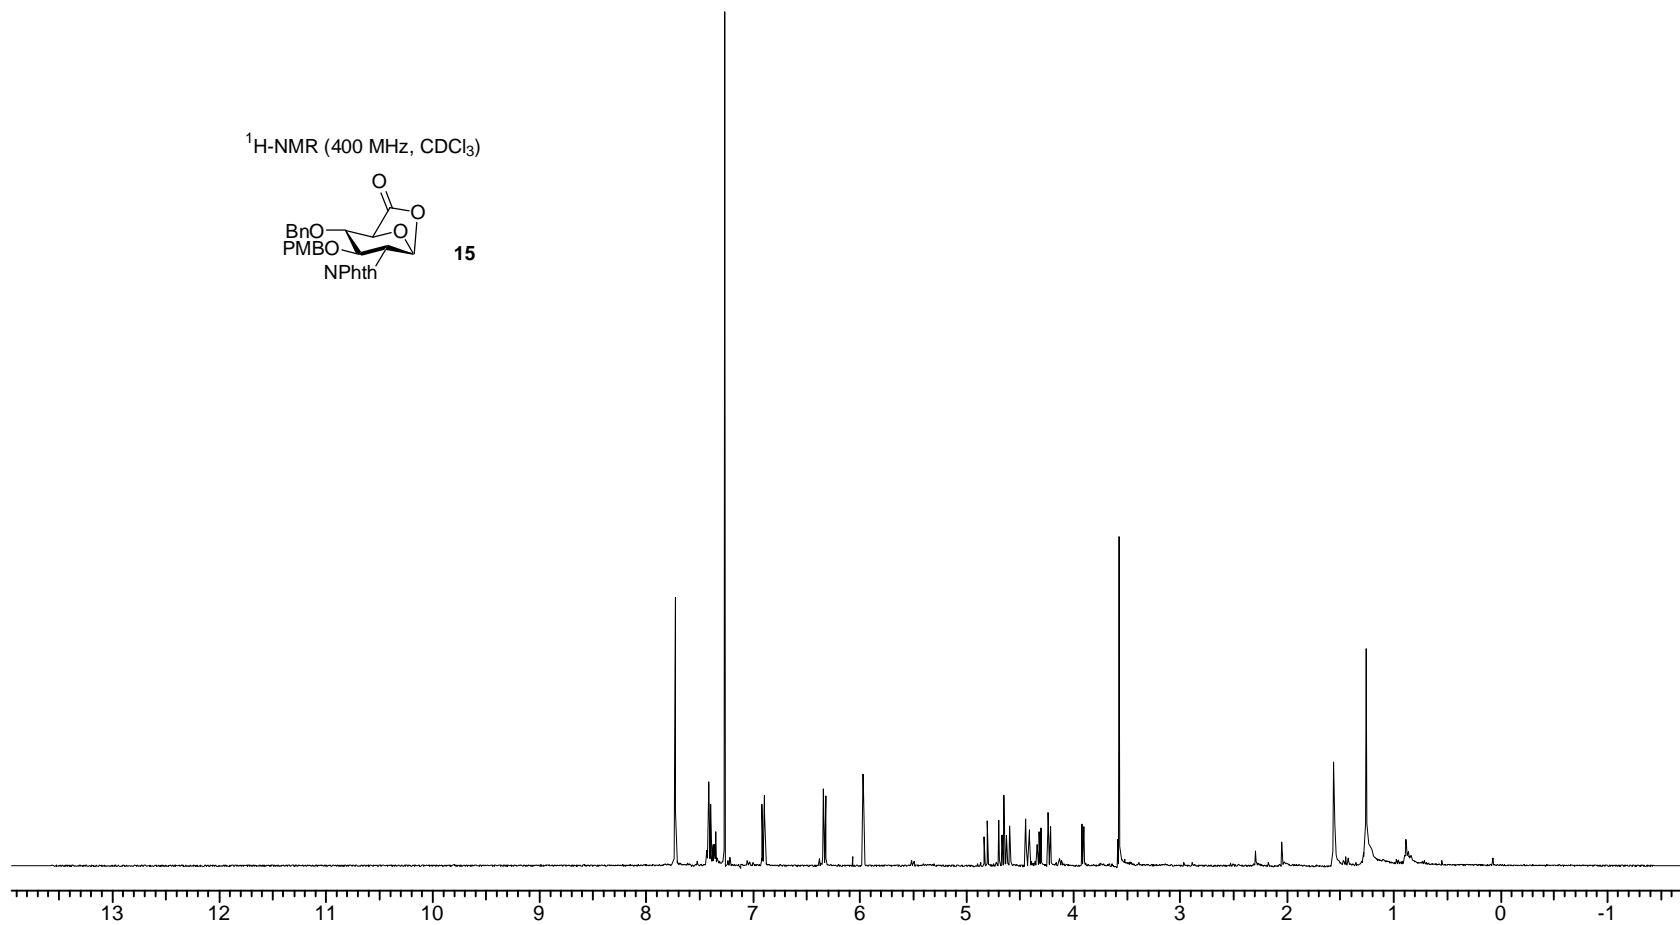



<sup>1</sup>H-NMR (600 MHz, CDCl<sub>3</sub>)

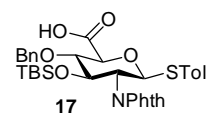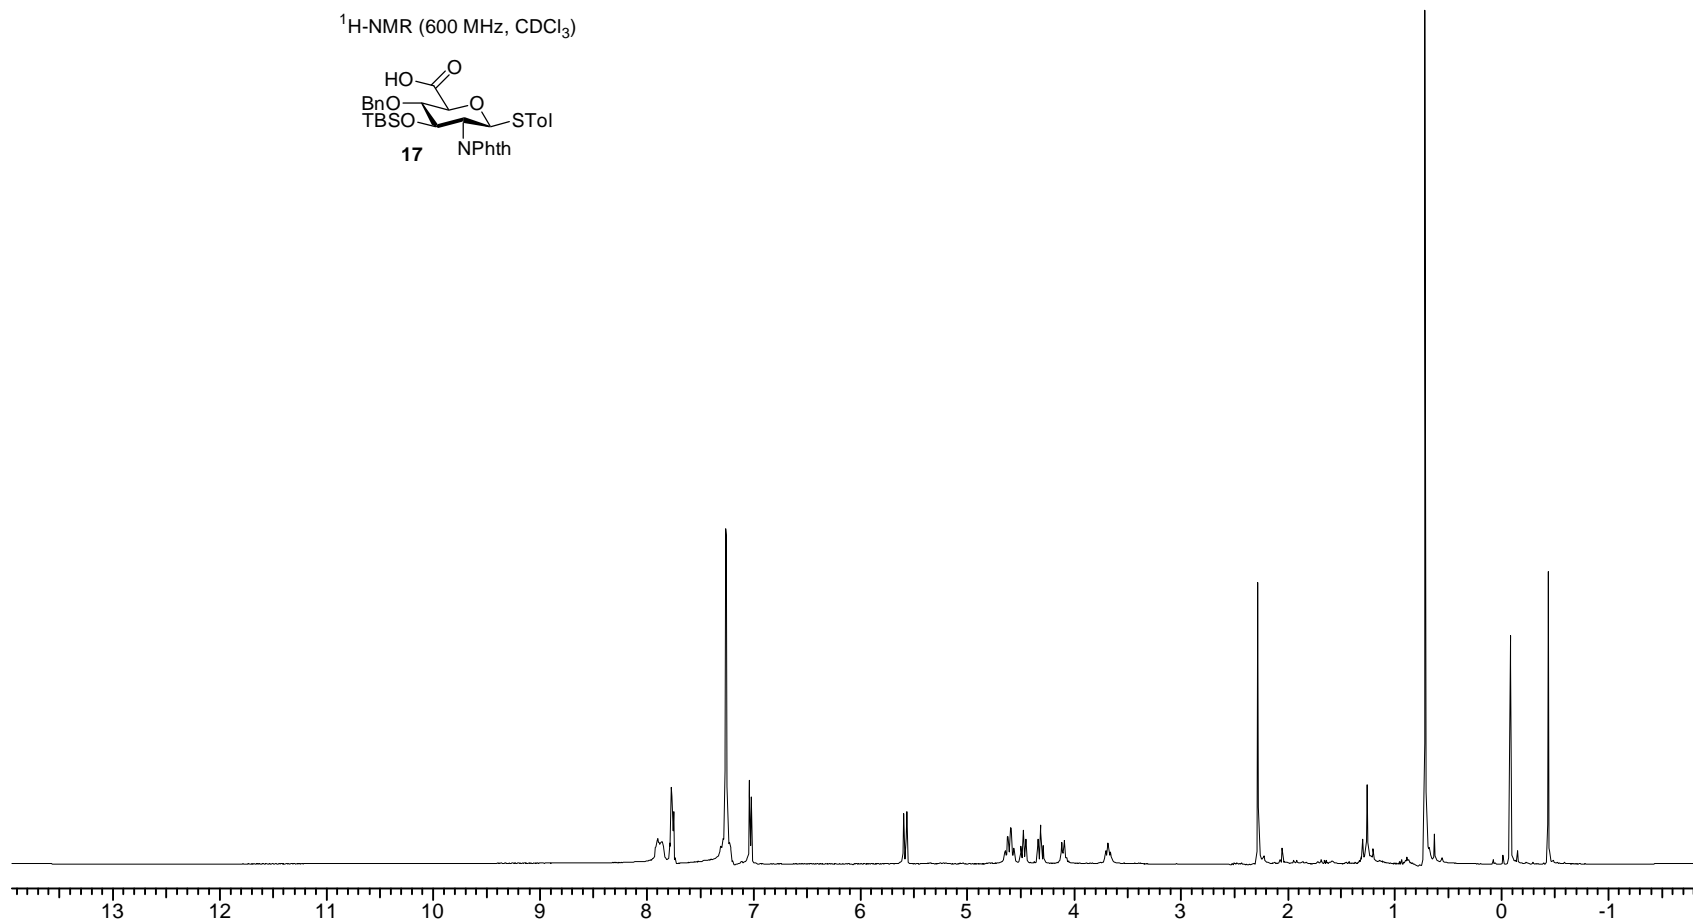

<sup>13</sup>C-NMR (150 MHz, CDCl<sub>3</sub>)

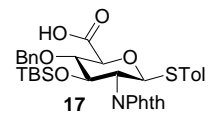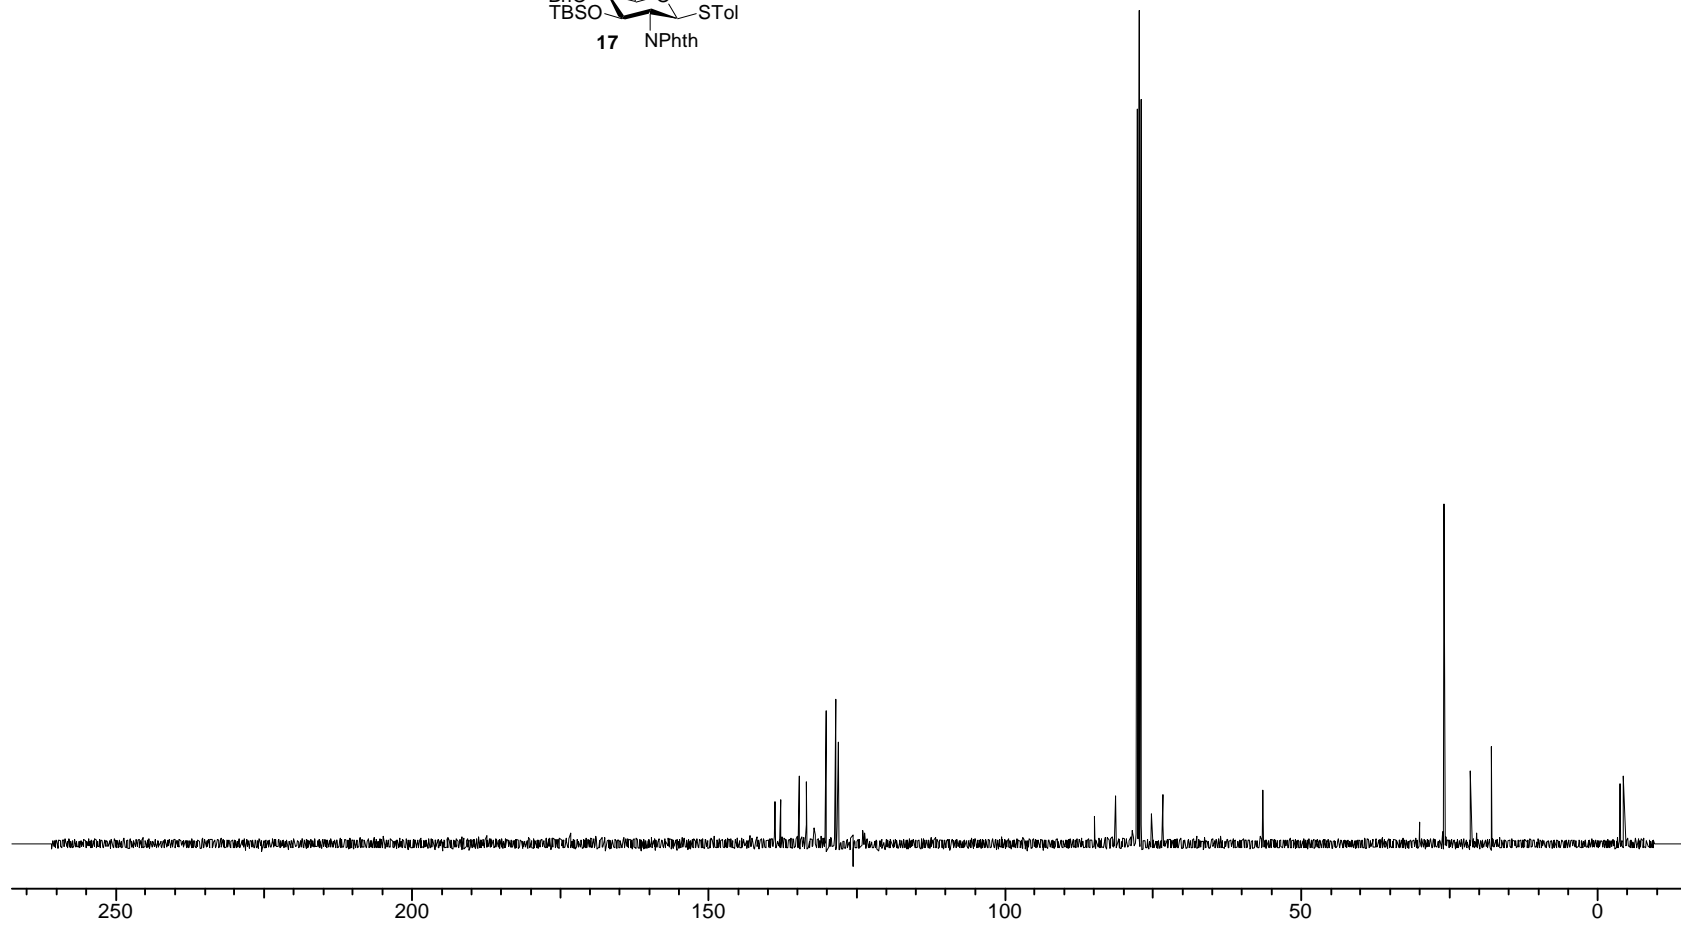

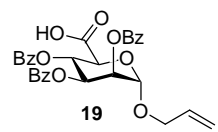

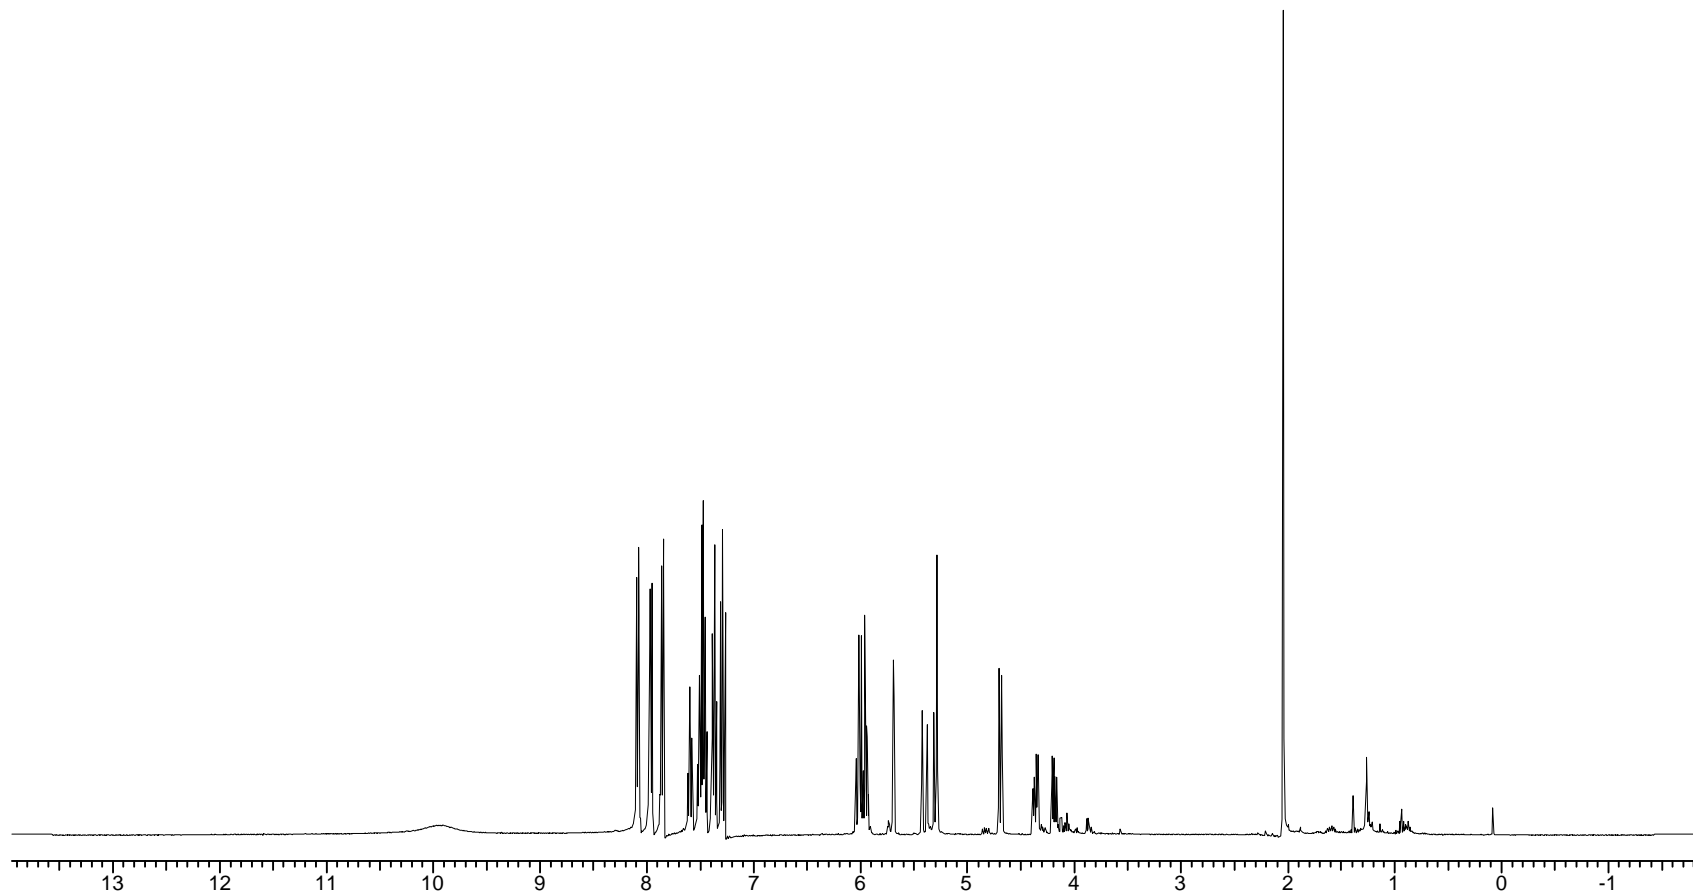



$^{13}\text{C}$ -NMR (100 MHz,  $\text{CDCl}_3$ )

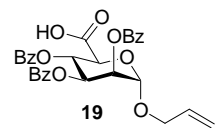

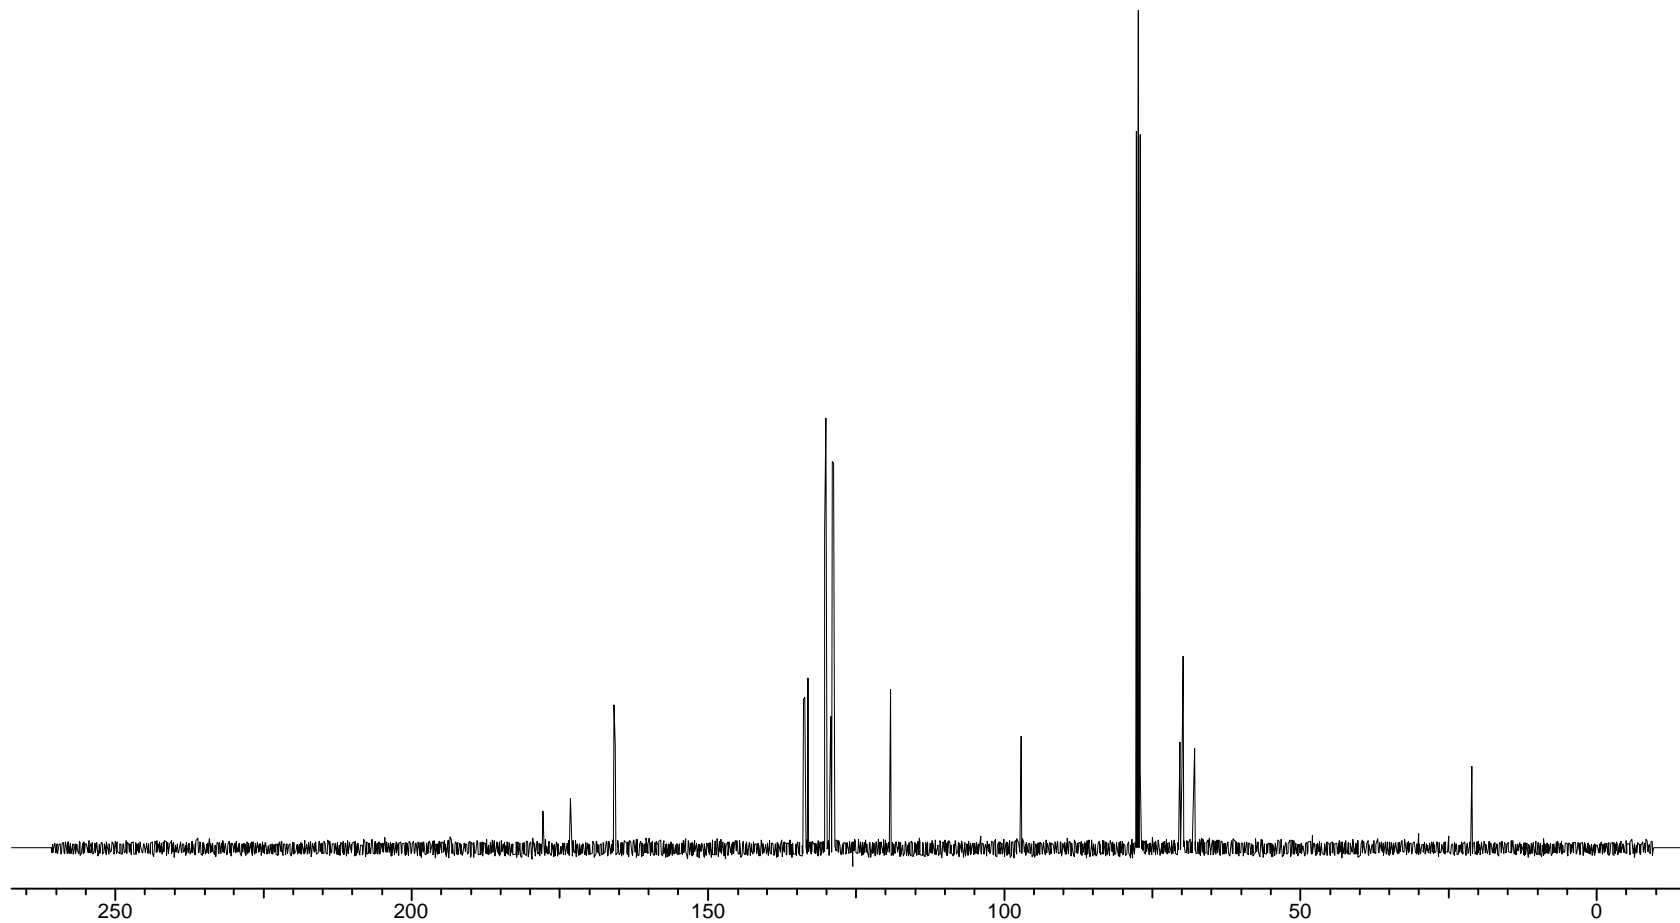

<sup>1</sup>H-NMR (600 MHz, CDCl<sub>3</sub>)

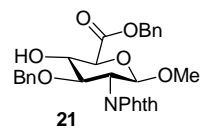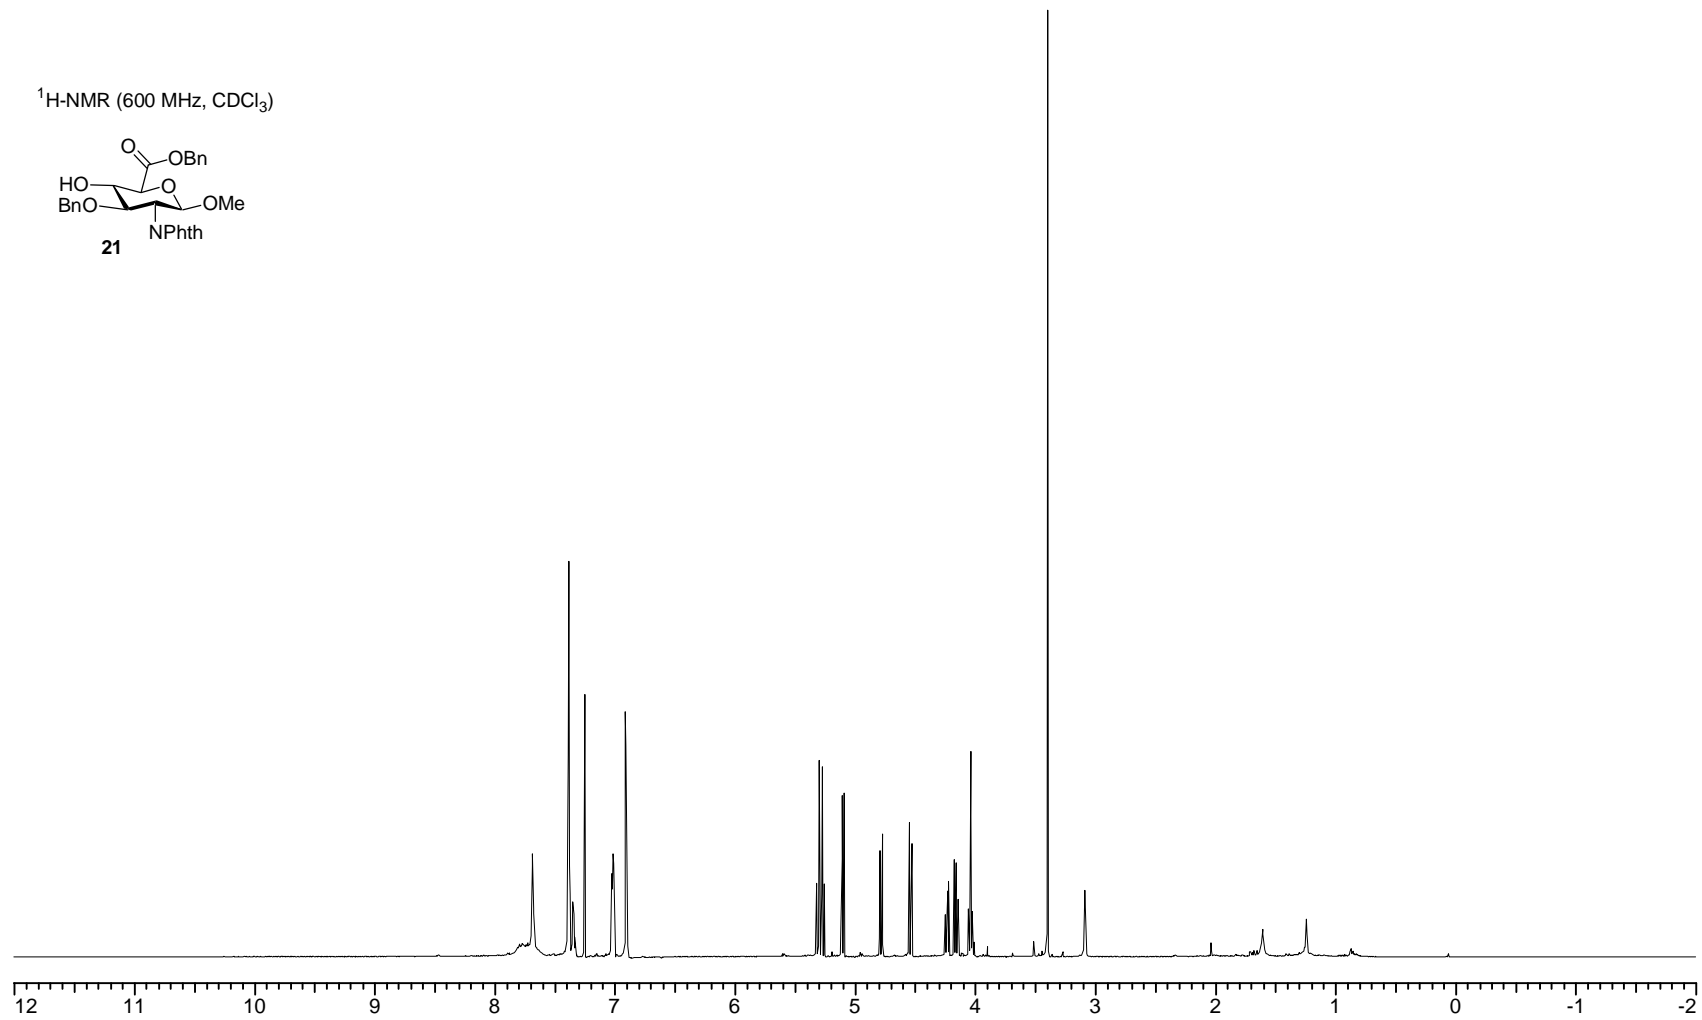

<sup>13</sup>C-NMR (150 MHz, CDCl<sub>3</sub>)

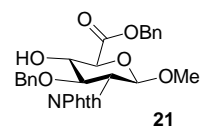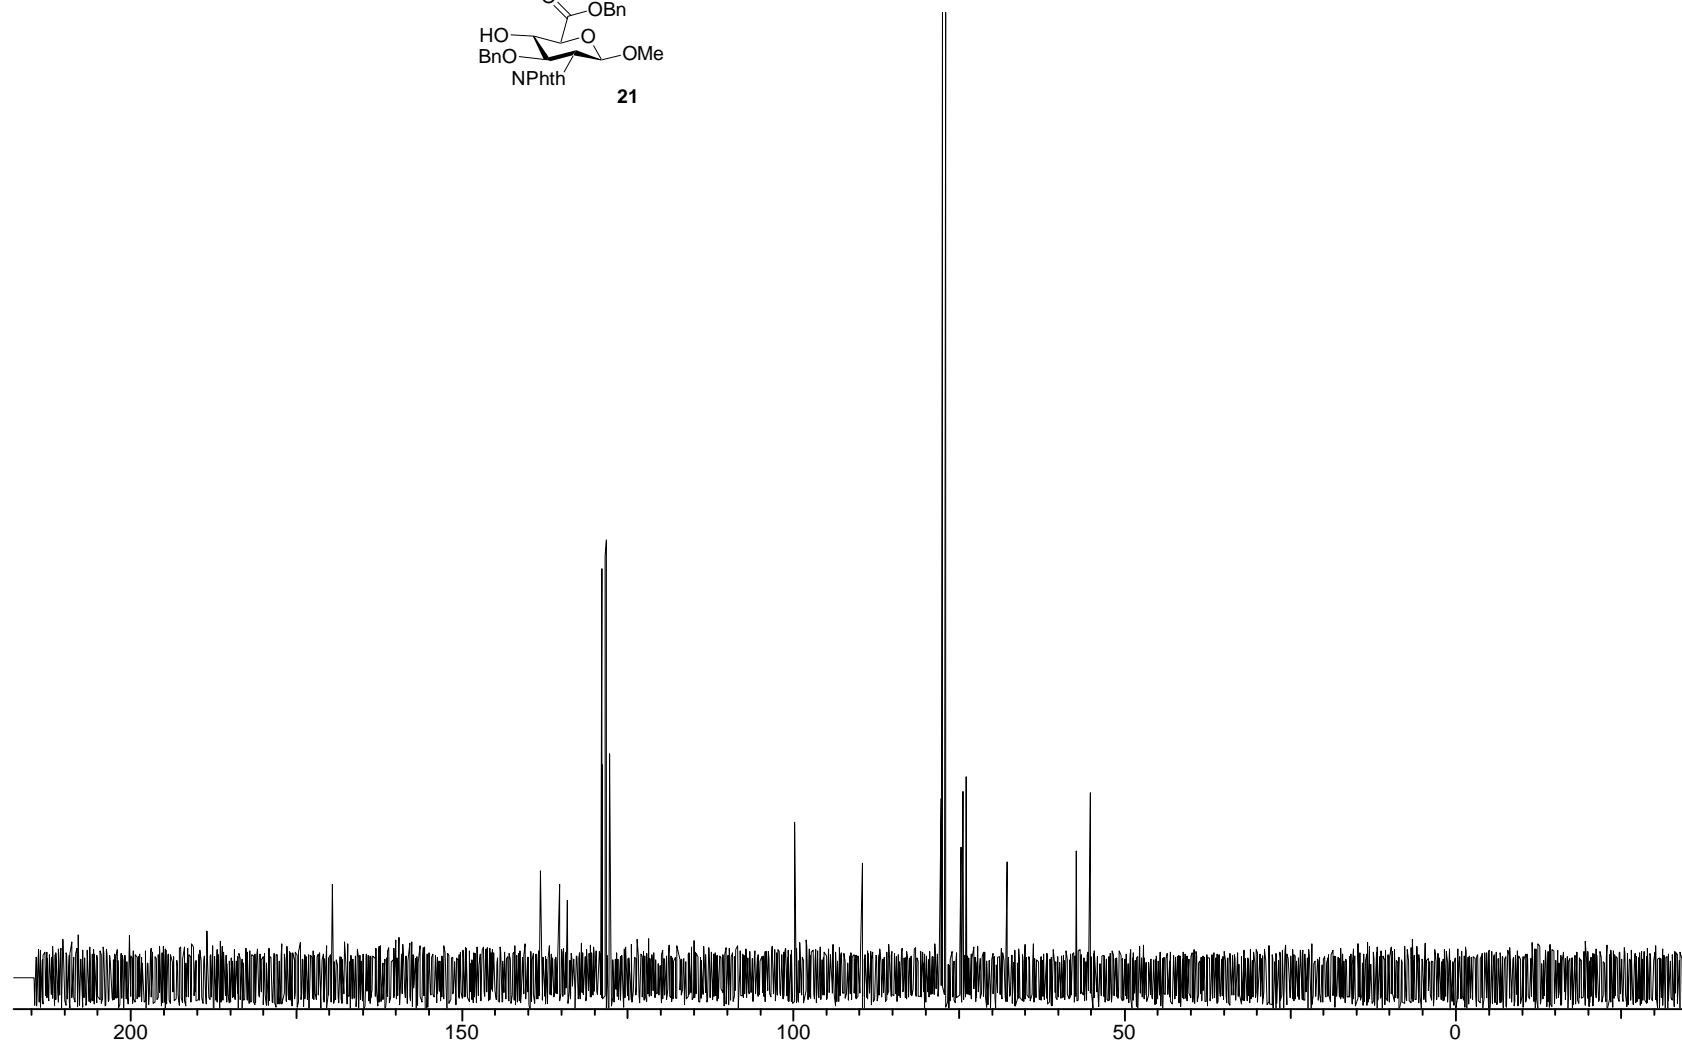



<sup>1</sup>H-NMR (400 MHz, CDCl<sub>3</sub>)

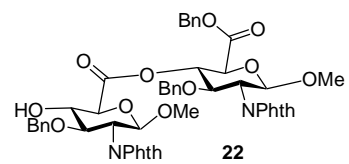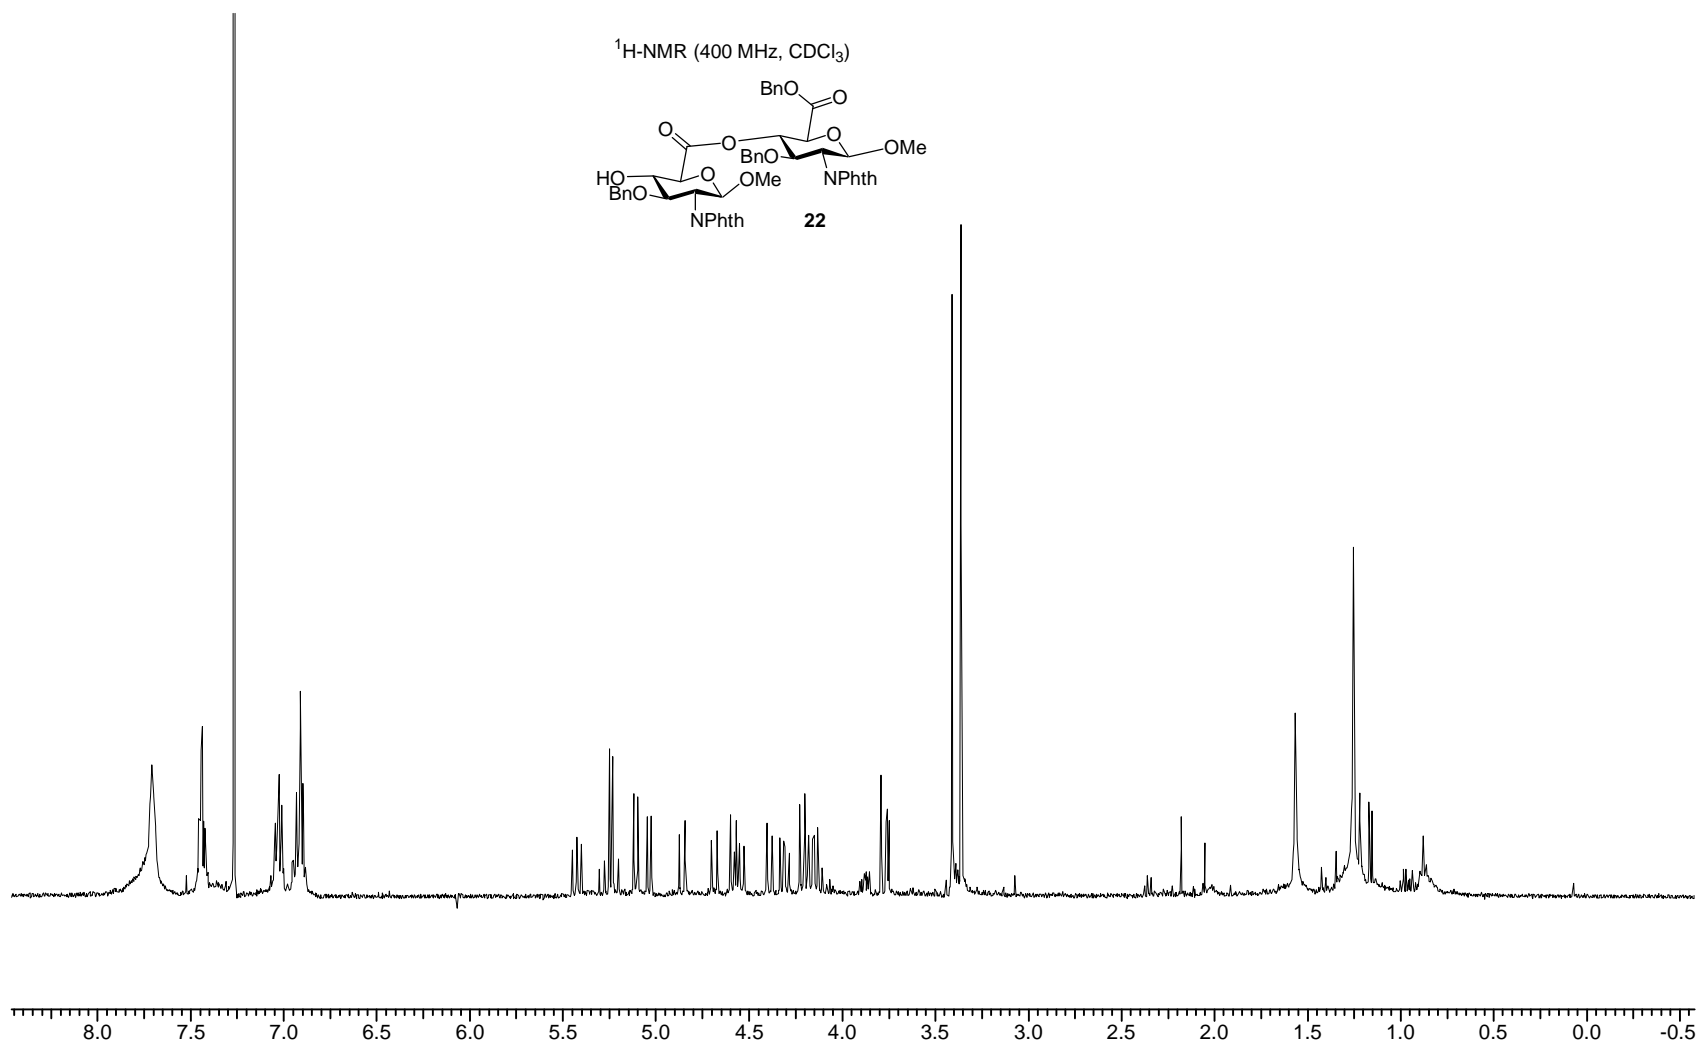

<sup>1</sup>H-NMR (600 MHz, CDCl<sub>3</sub>)

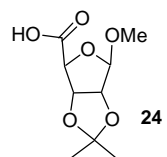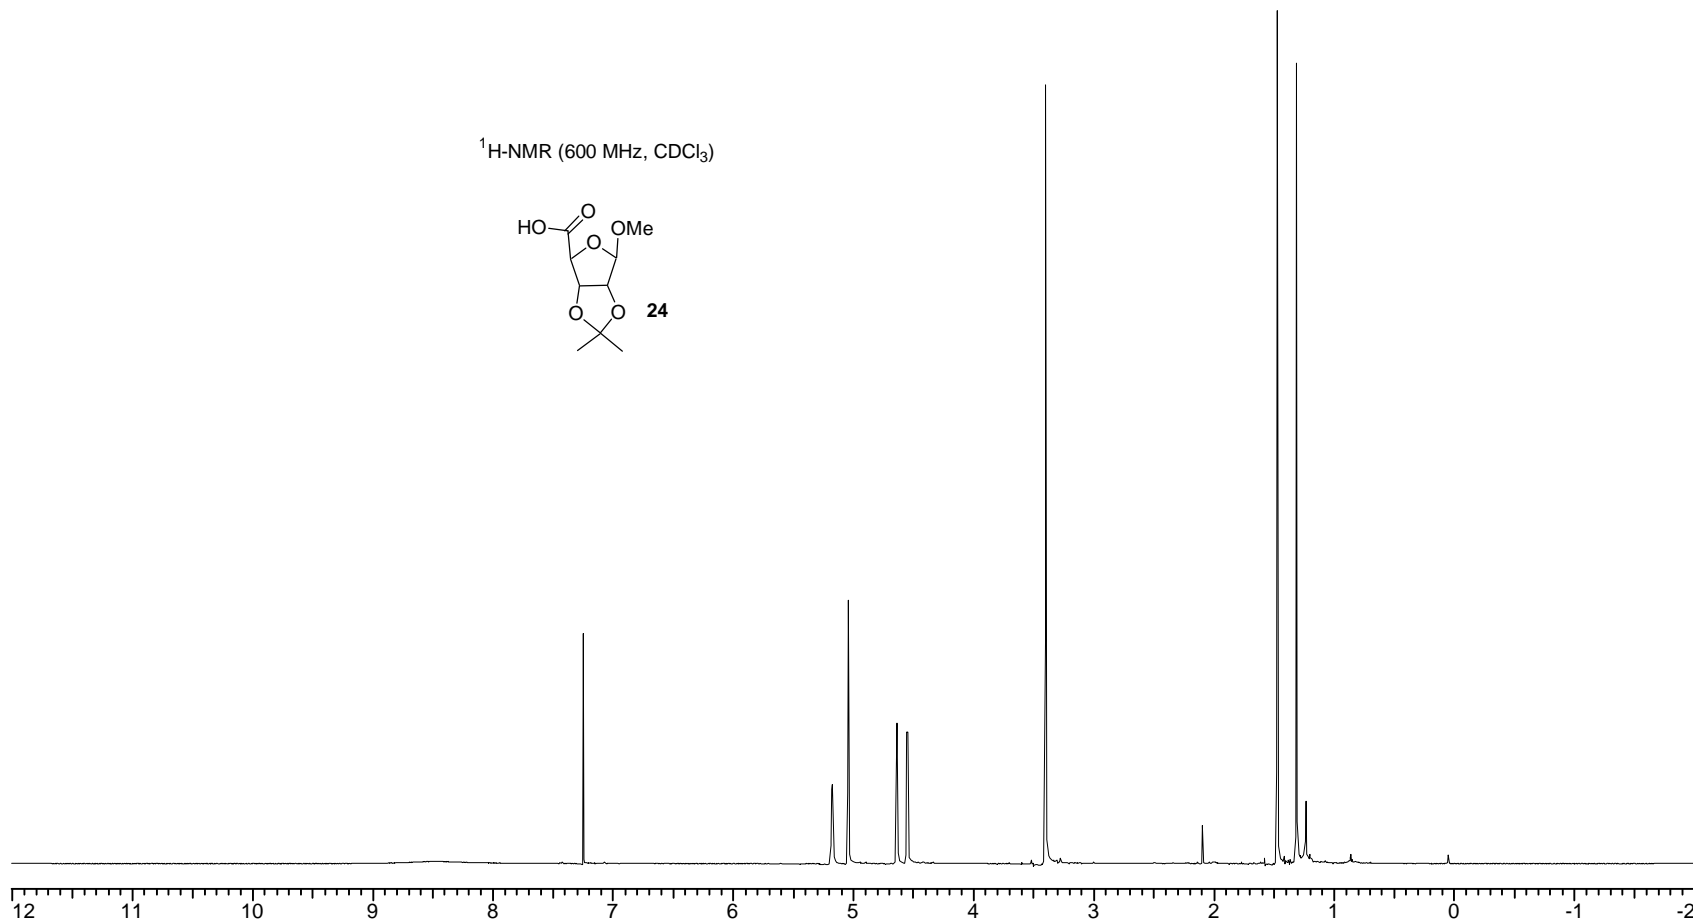

$^{13}\text{C}$ -NMR (150 MHz,  $\text{CDCl}_3$ )

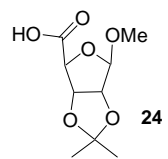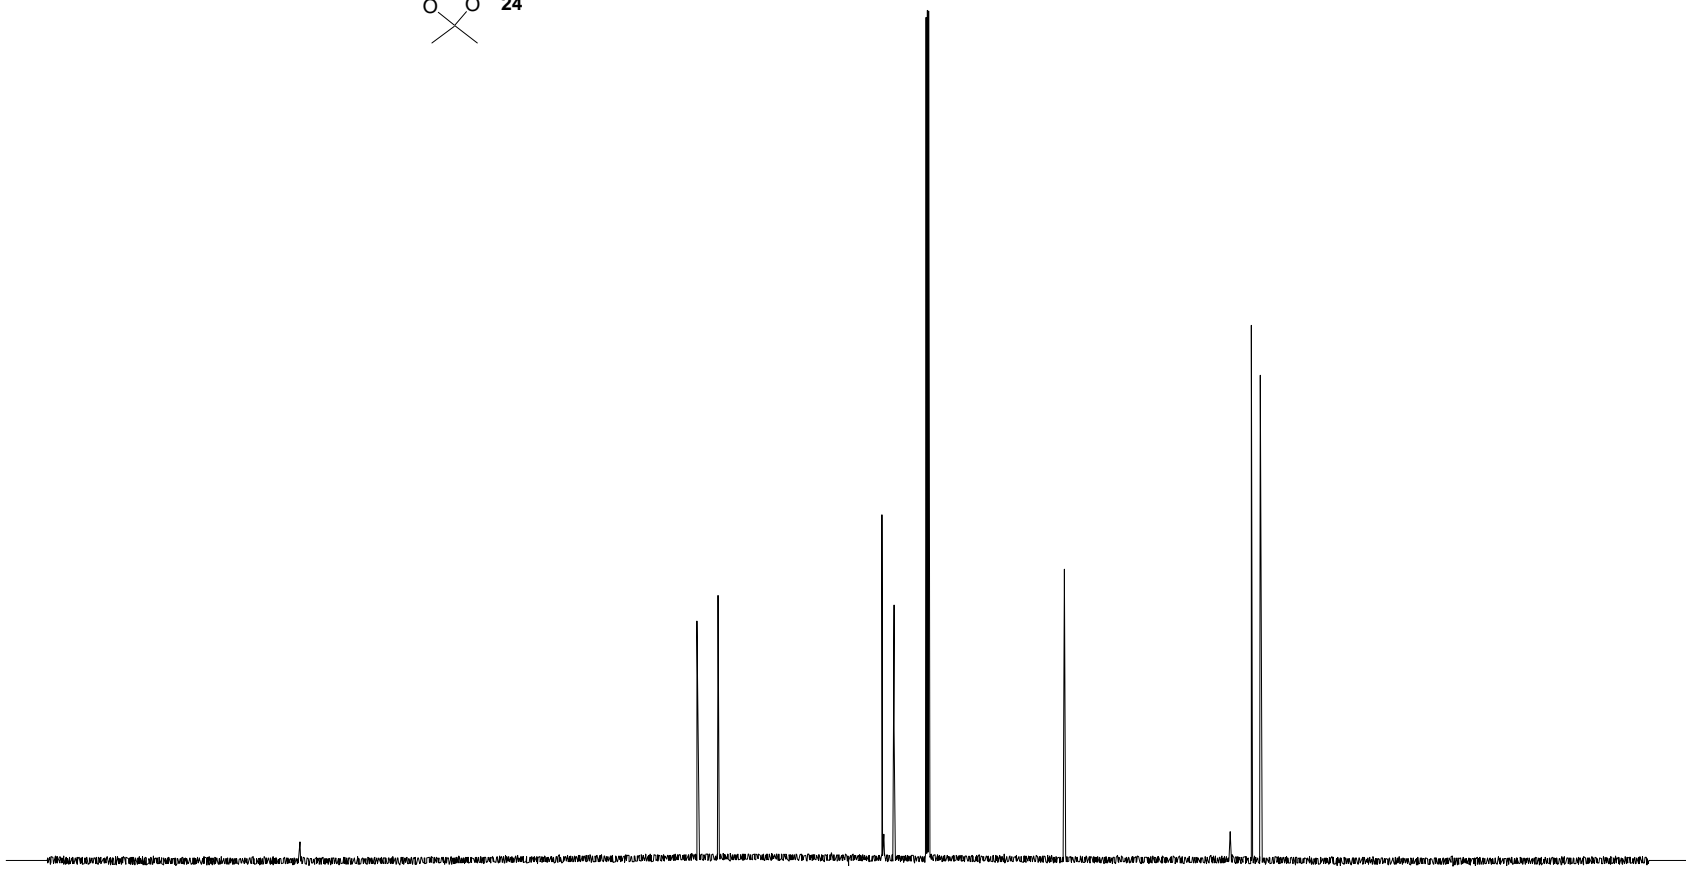



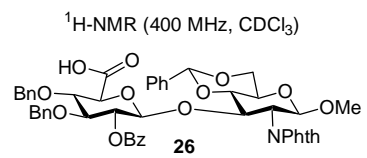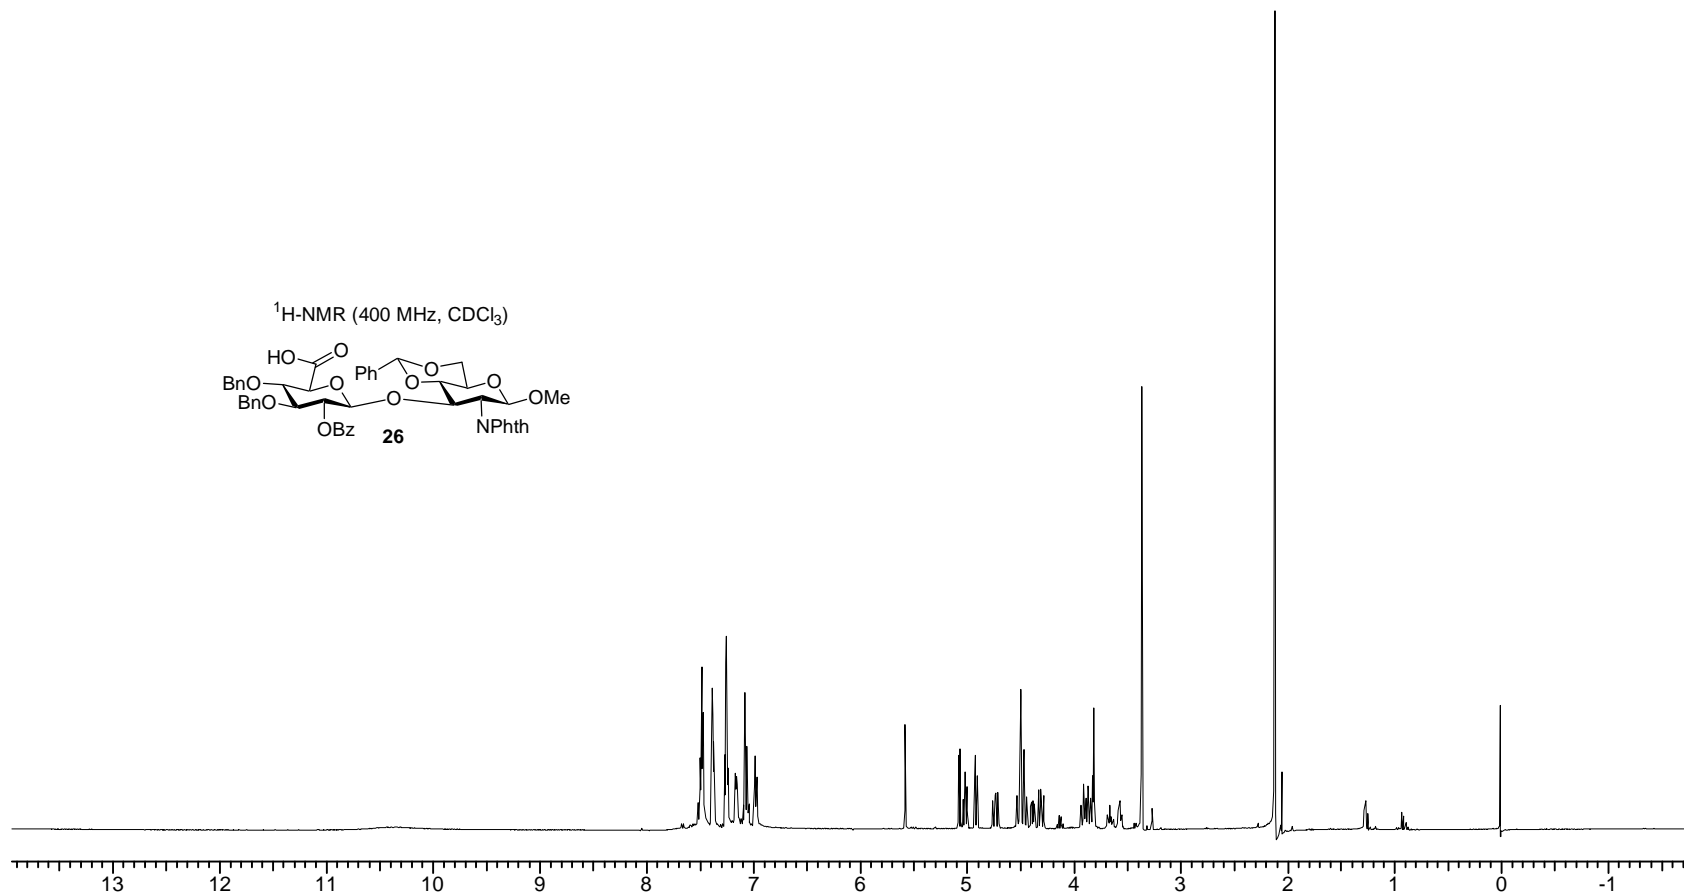



$^{13}\text{C}$ -NMR (100 MHz,  $\text{CDCl}_3$ )

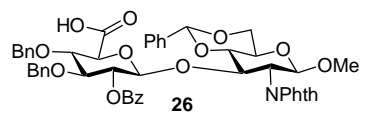

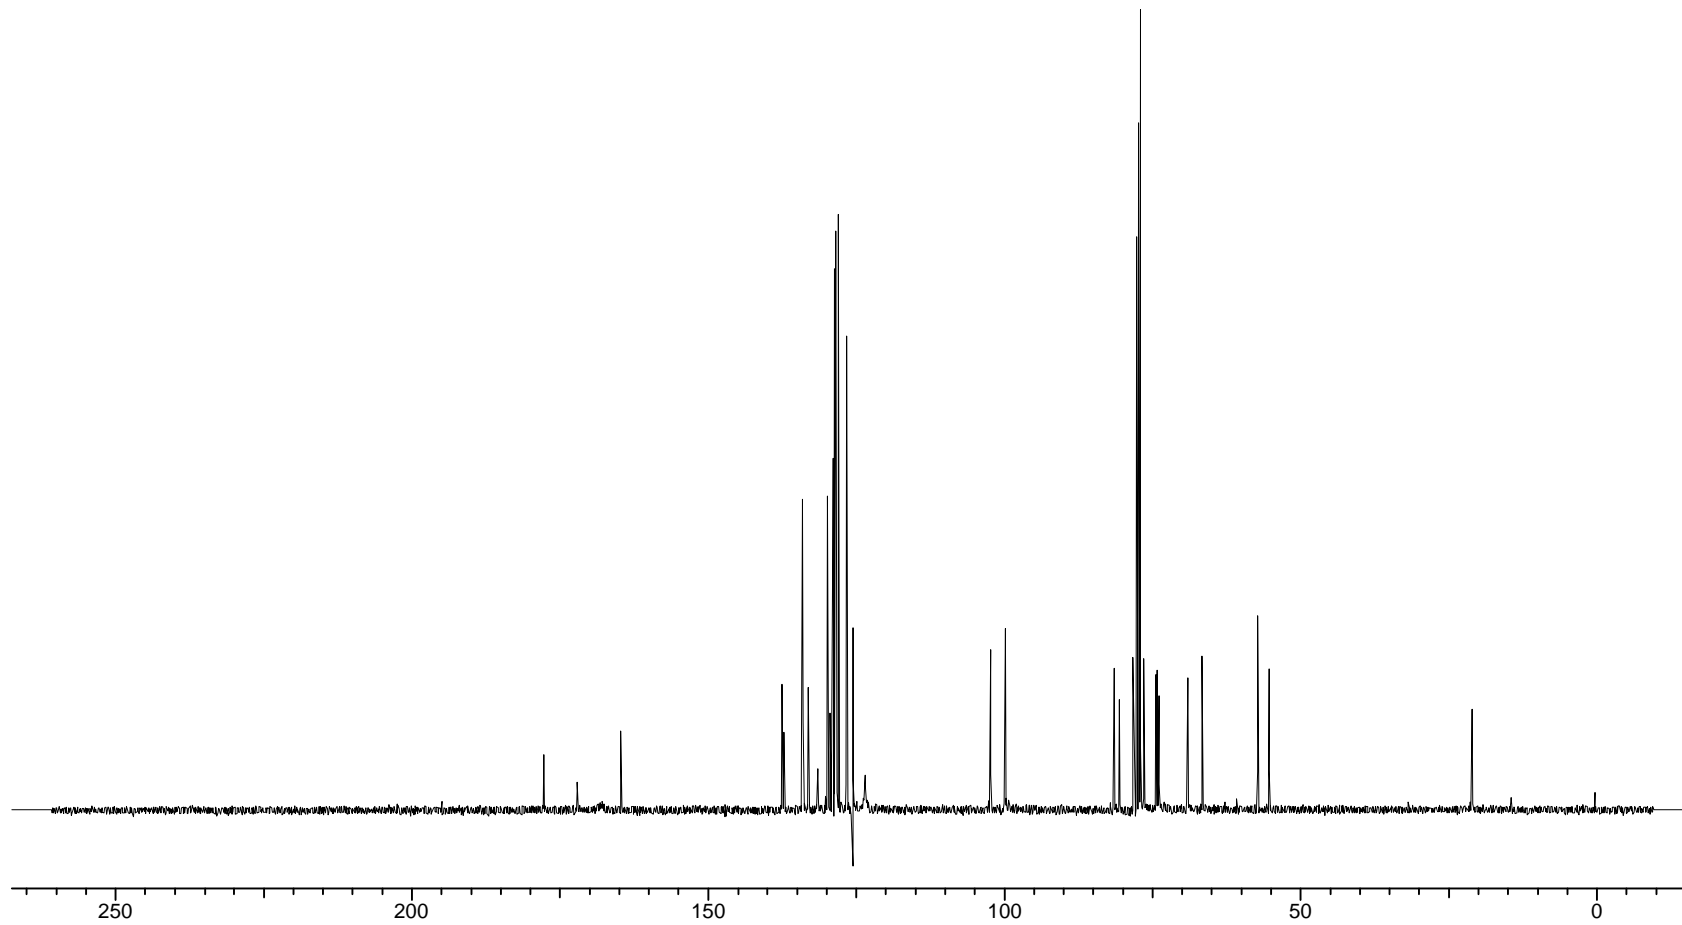

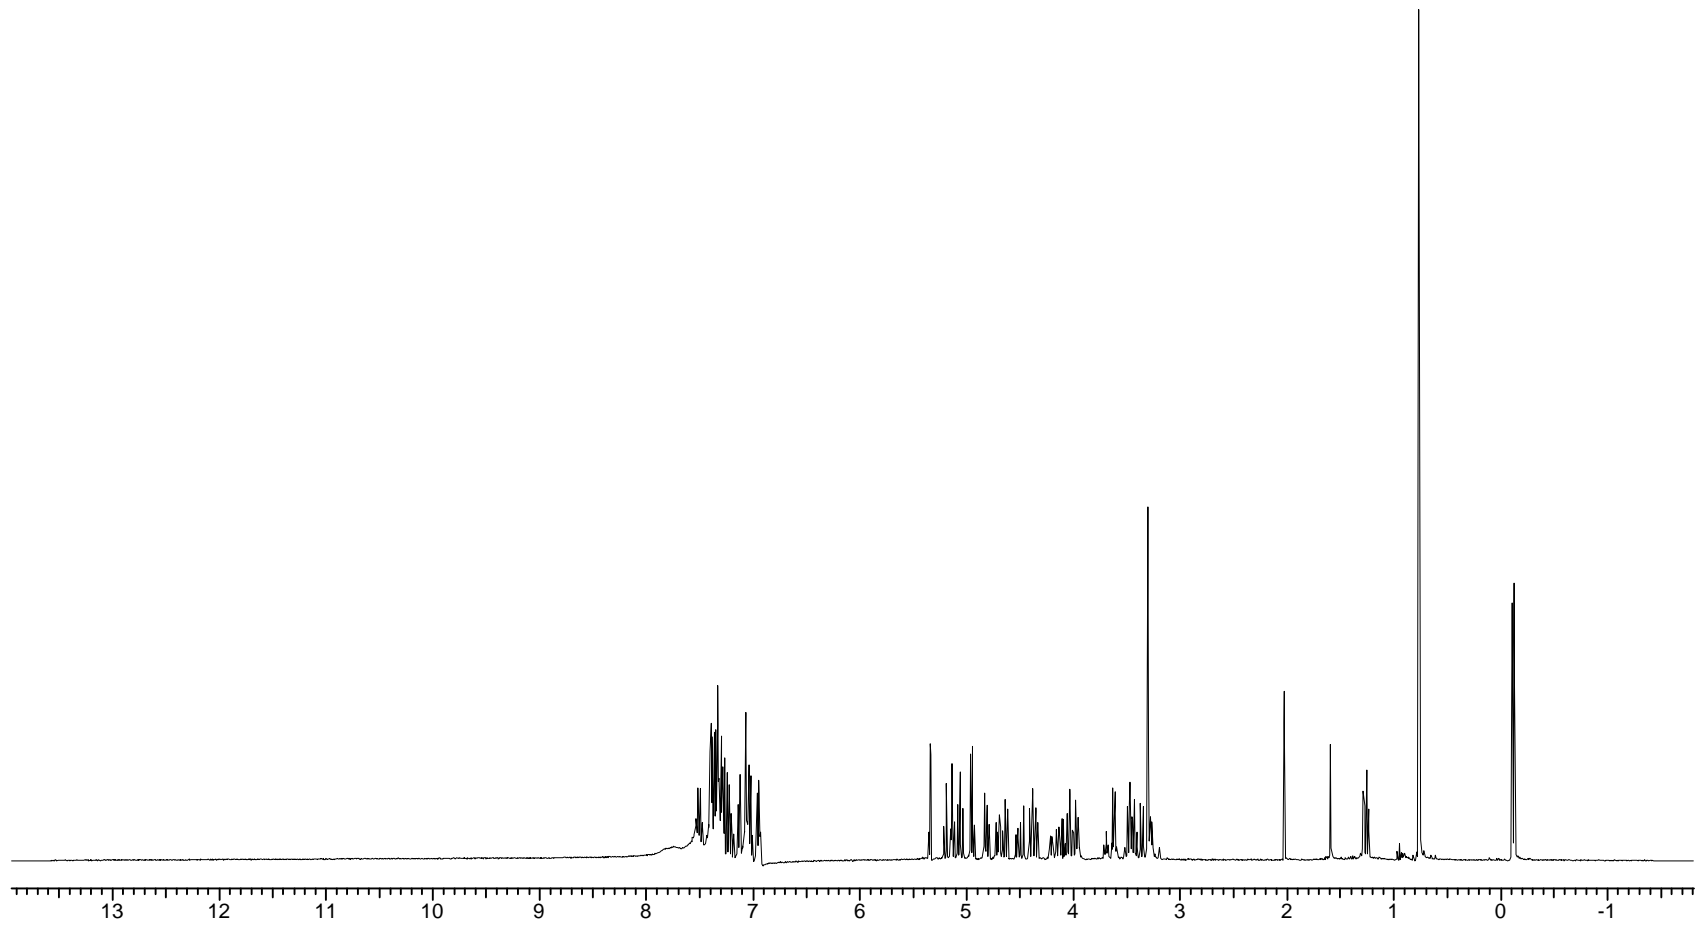

$^1\text{H-NMR}$  (600 MHz,  $\text{CD}_2\text{Cl}_2$ )

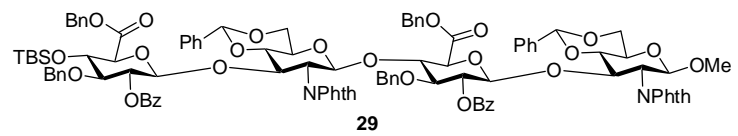

$^{13}\text{C-NMR}$  (100 MHz,  $\text{CD}_2\text{Cl}_2$ )

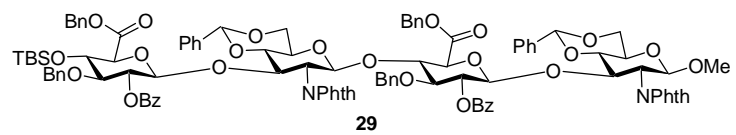

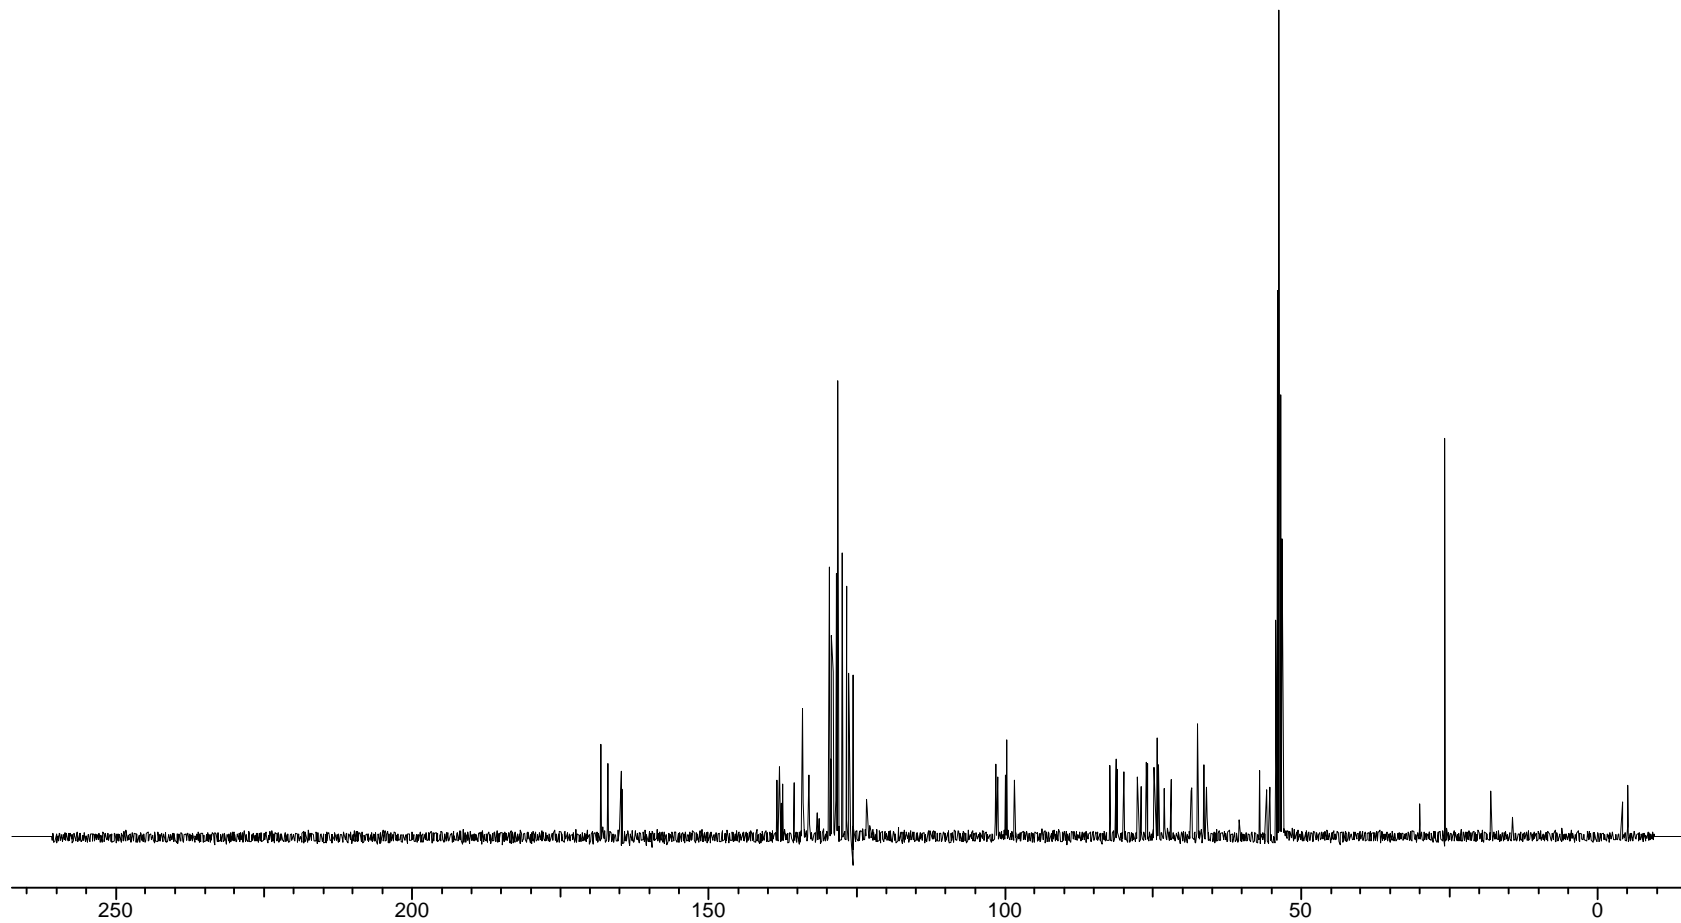



<sup>1</sup>H-NMR (600 MHz, CD<sub>2</sub>Cl<sub>2</sub>)

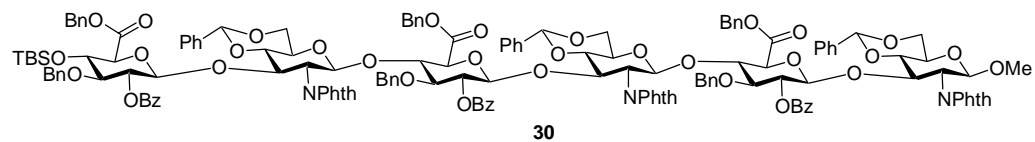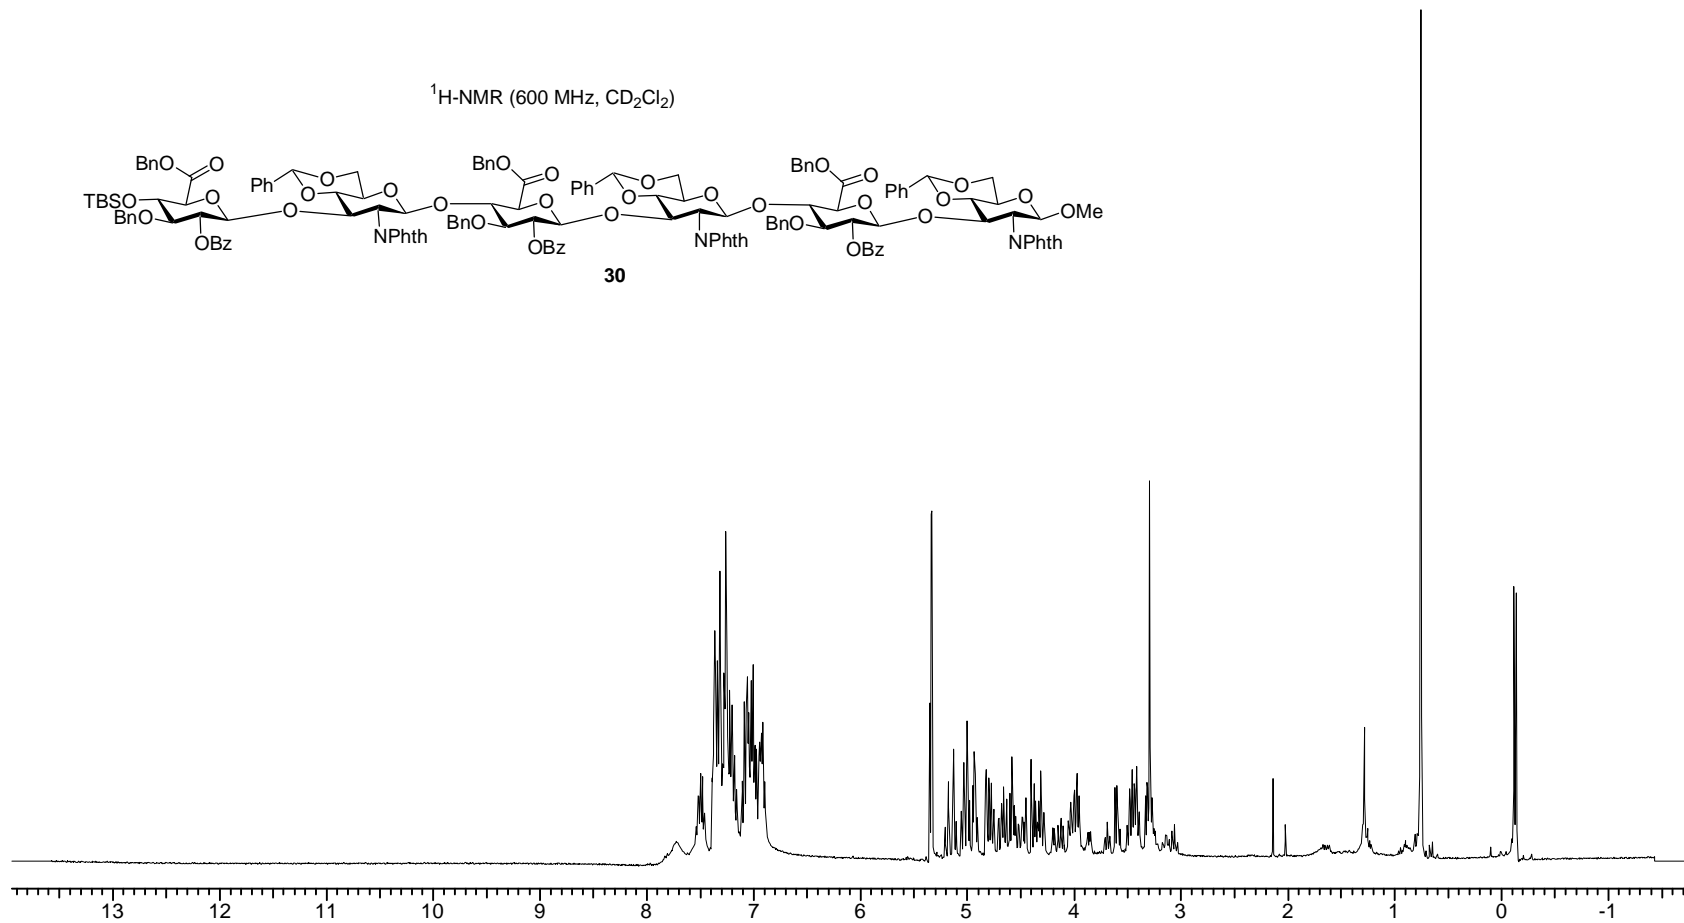

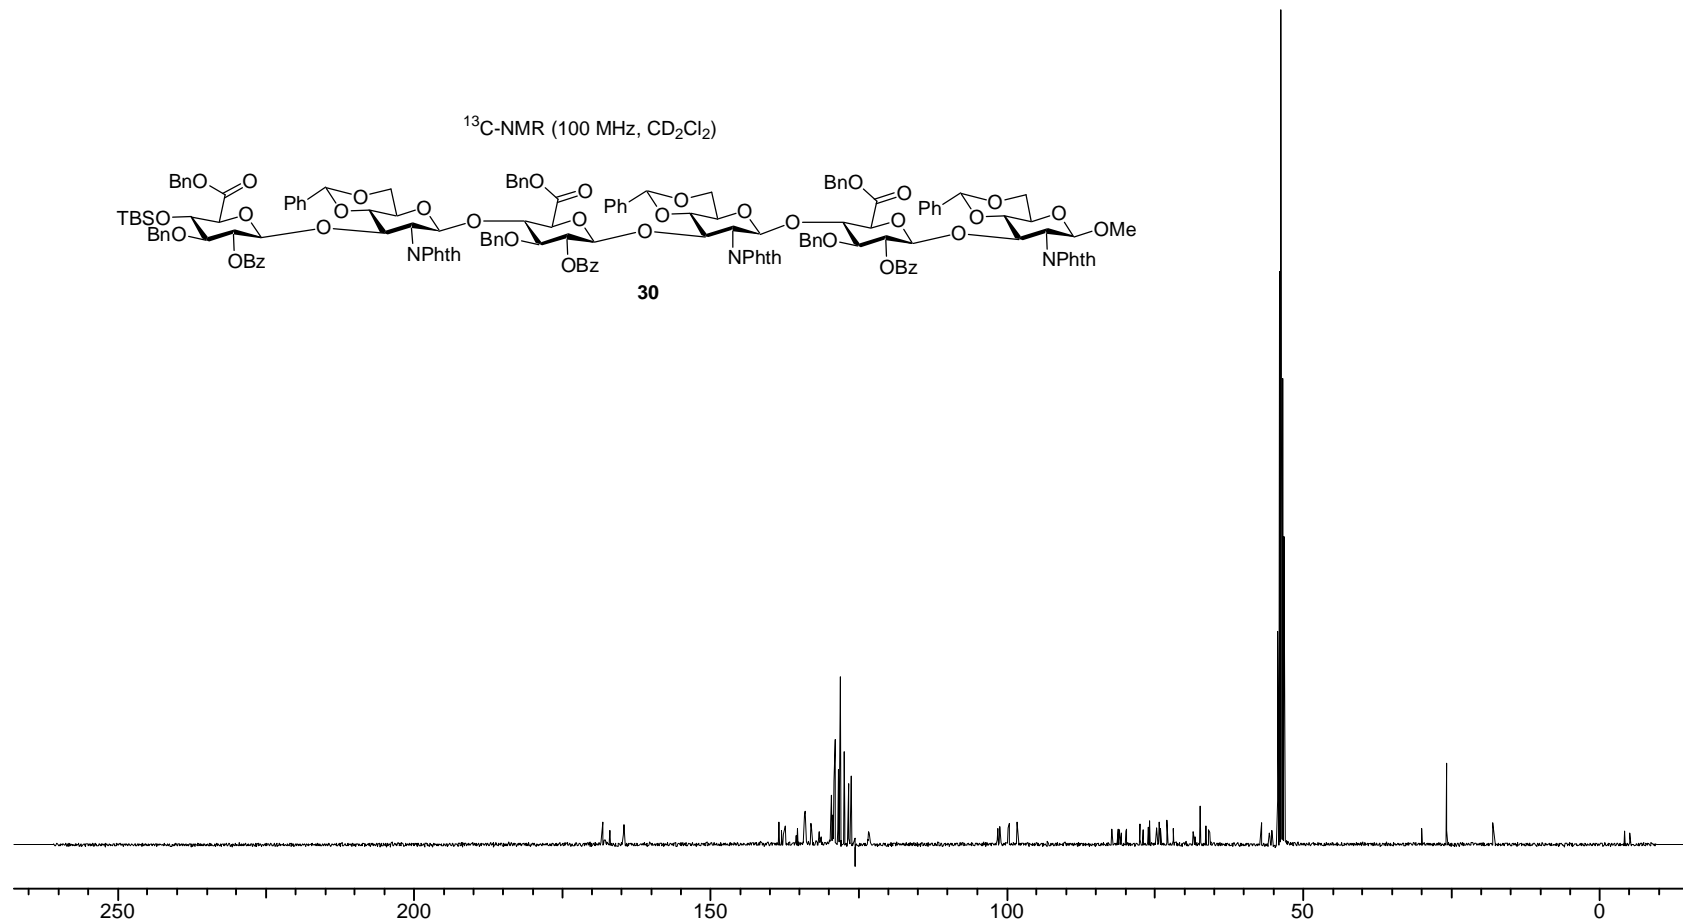



<sup>1</sup>H-NMR (600 MHz, CDCl<sub>3</sub>)

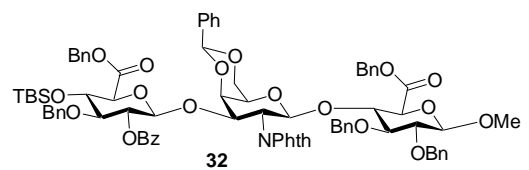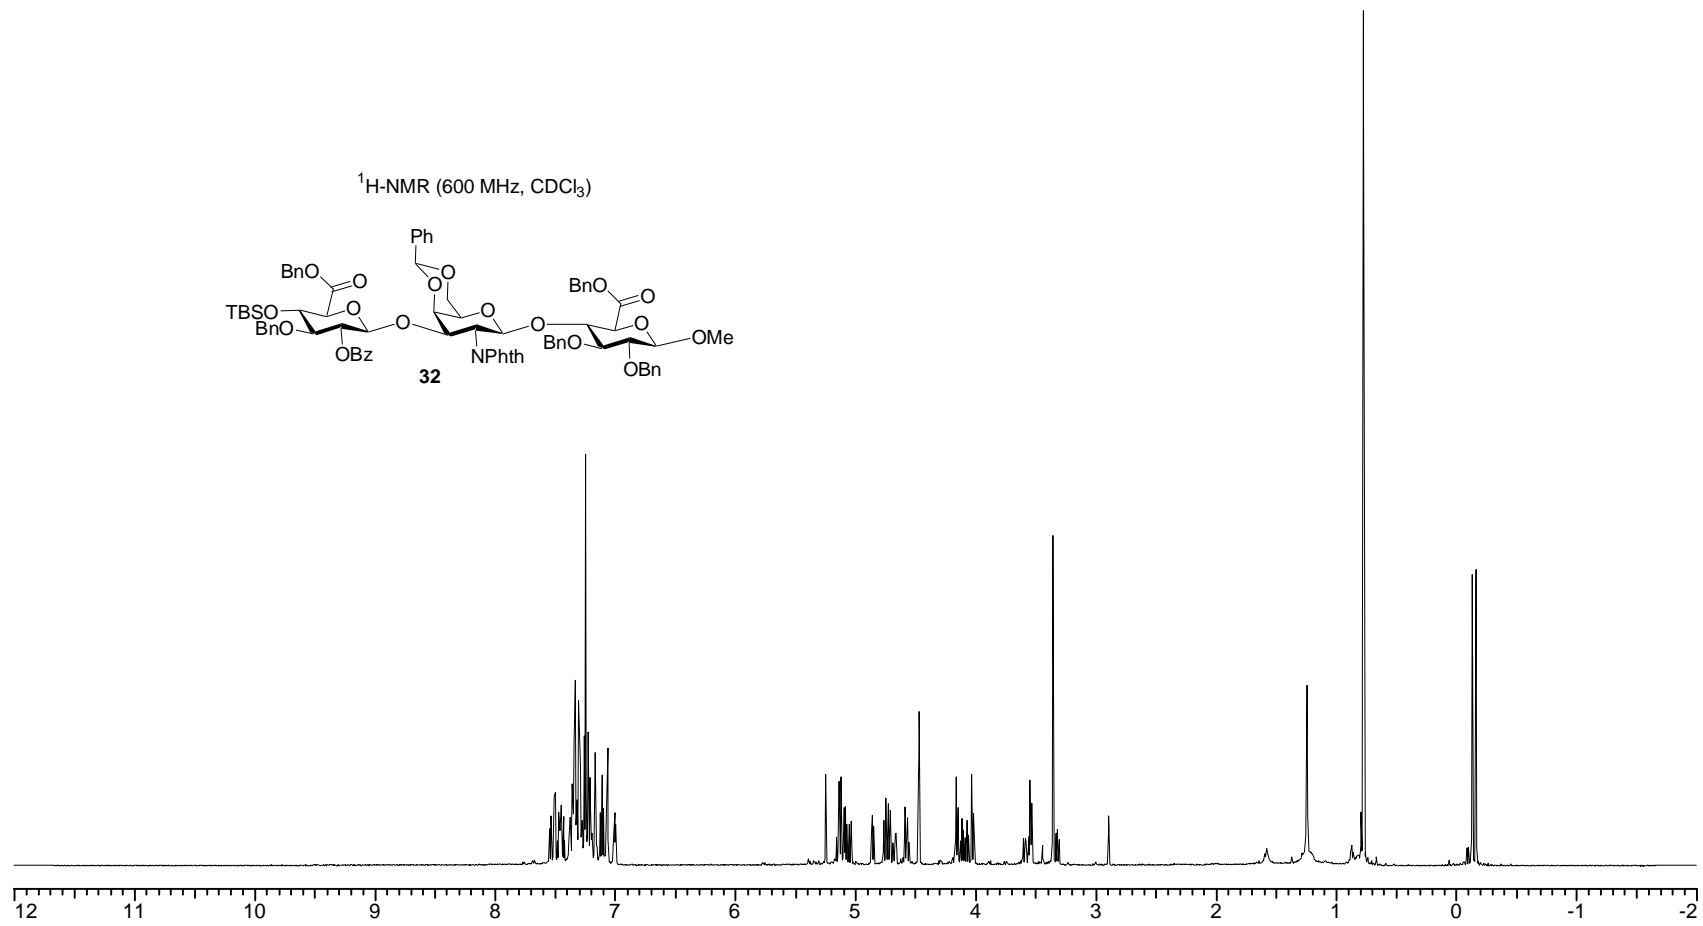



$^{13}\text{C}$ -NMR (150 MHz,  $\text{CDCl}_3$ )

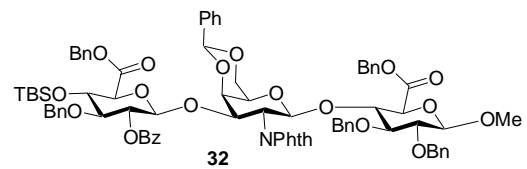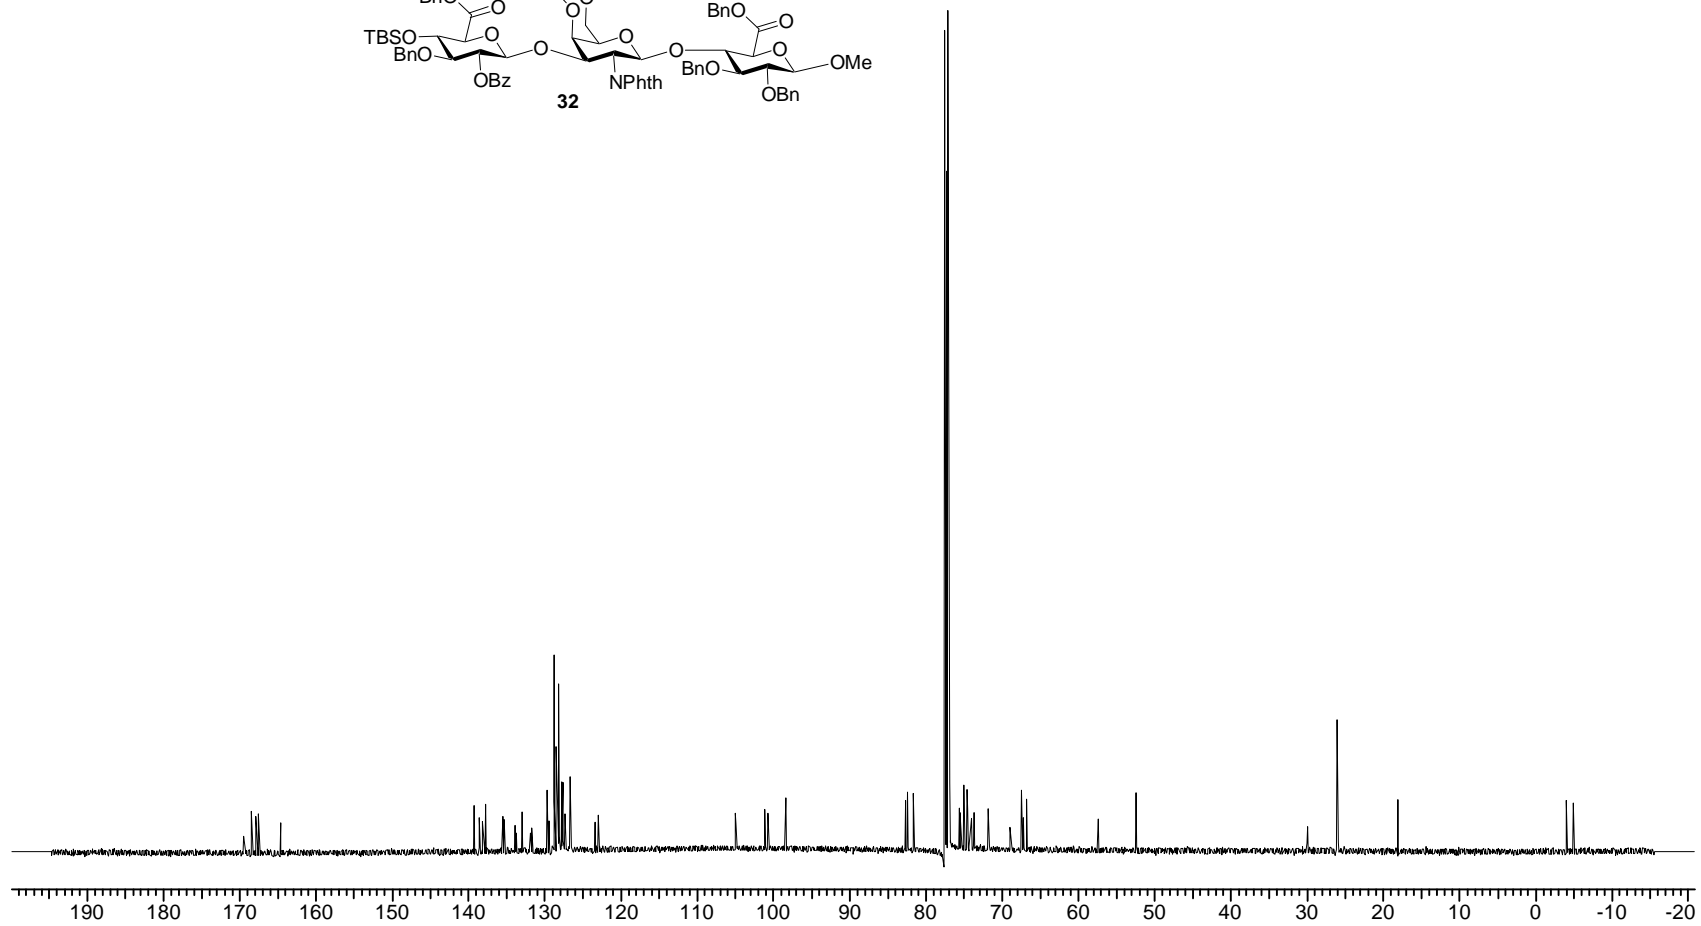

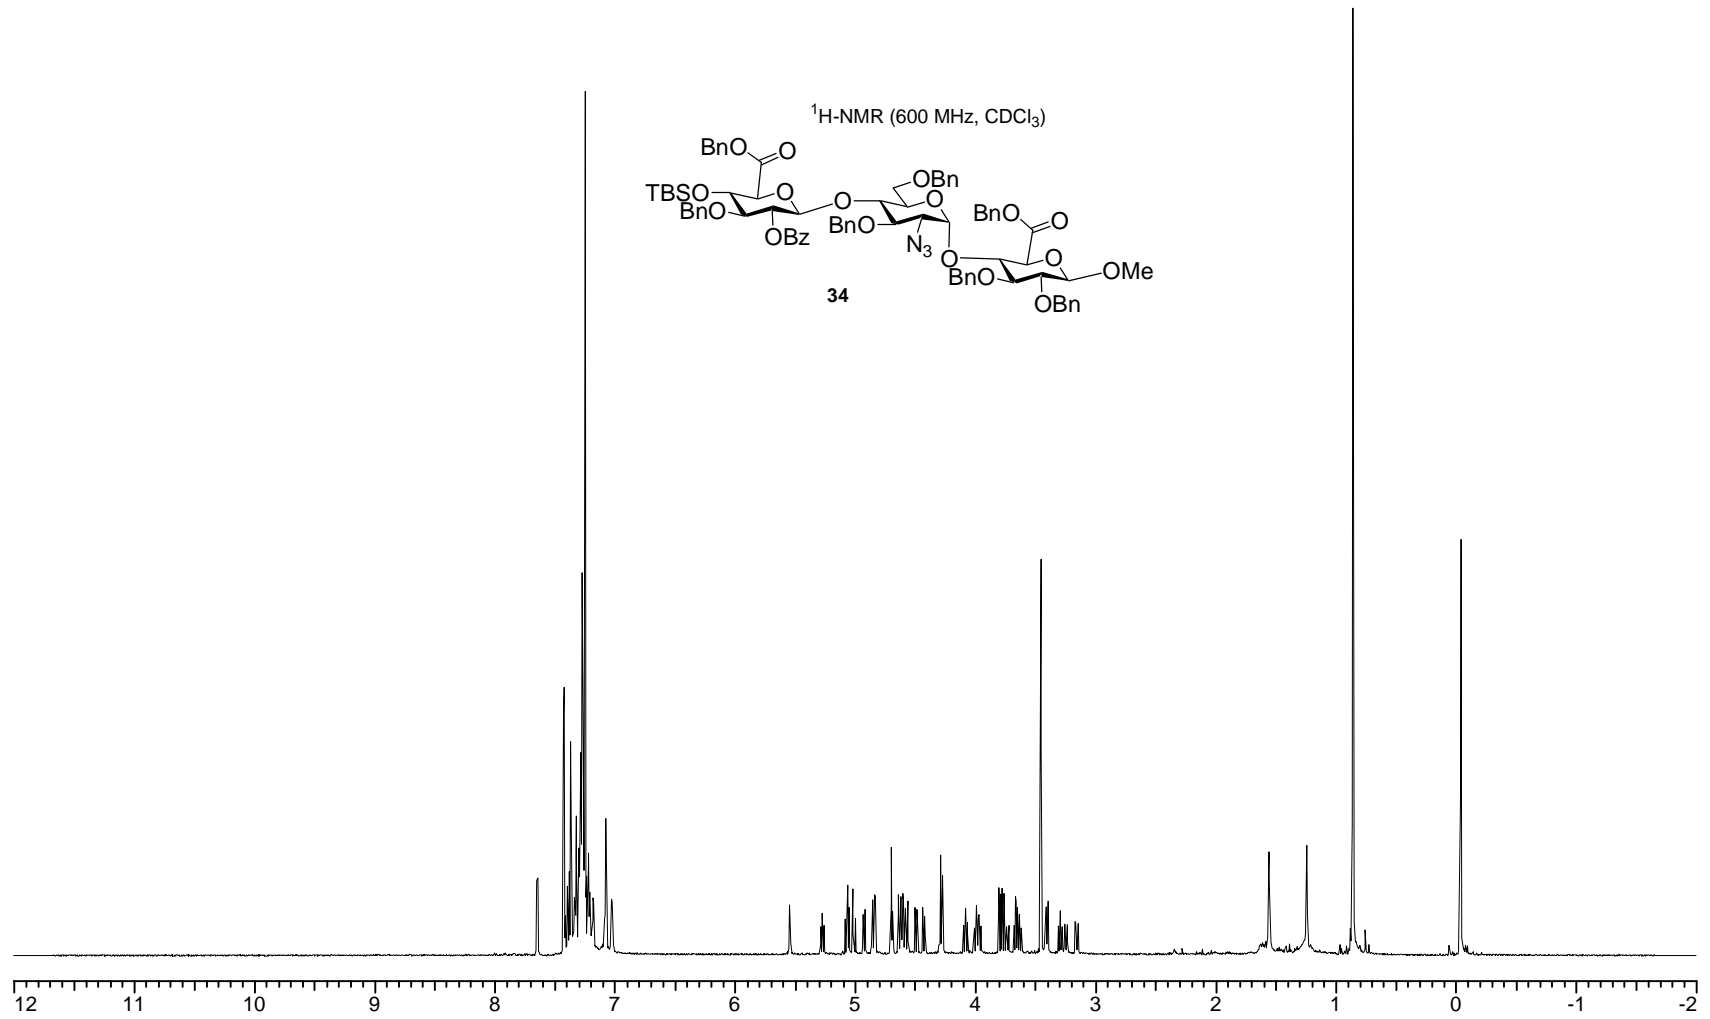

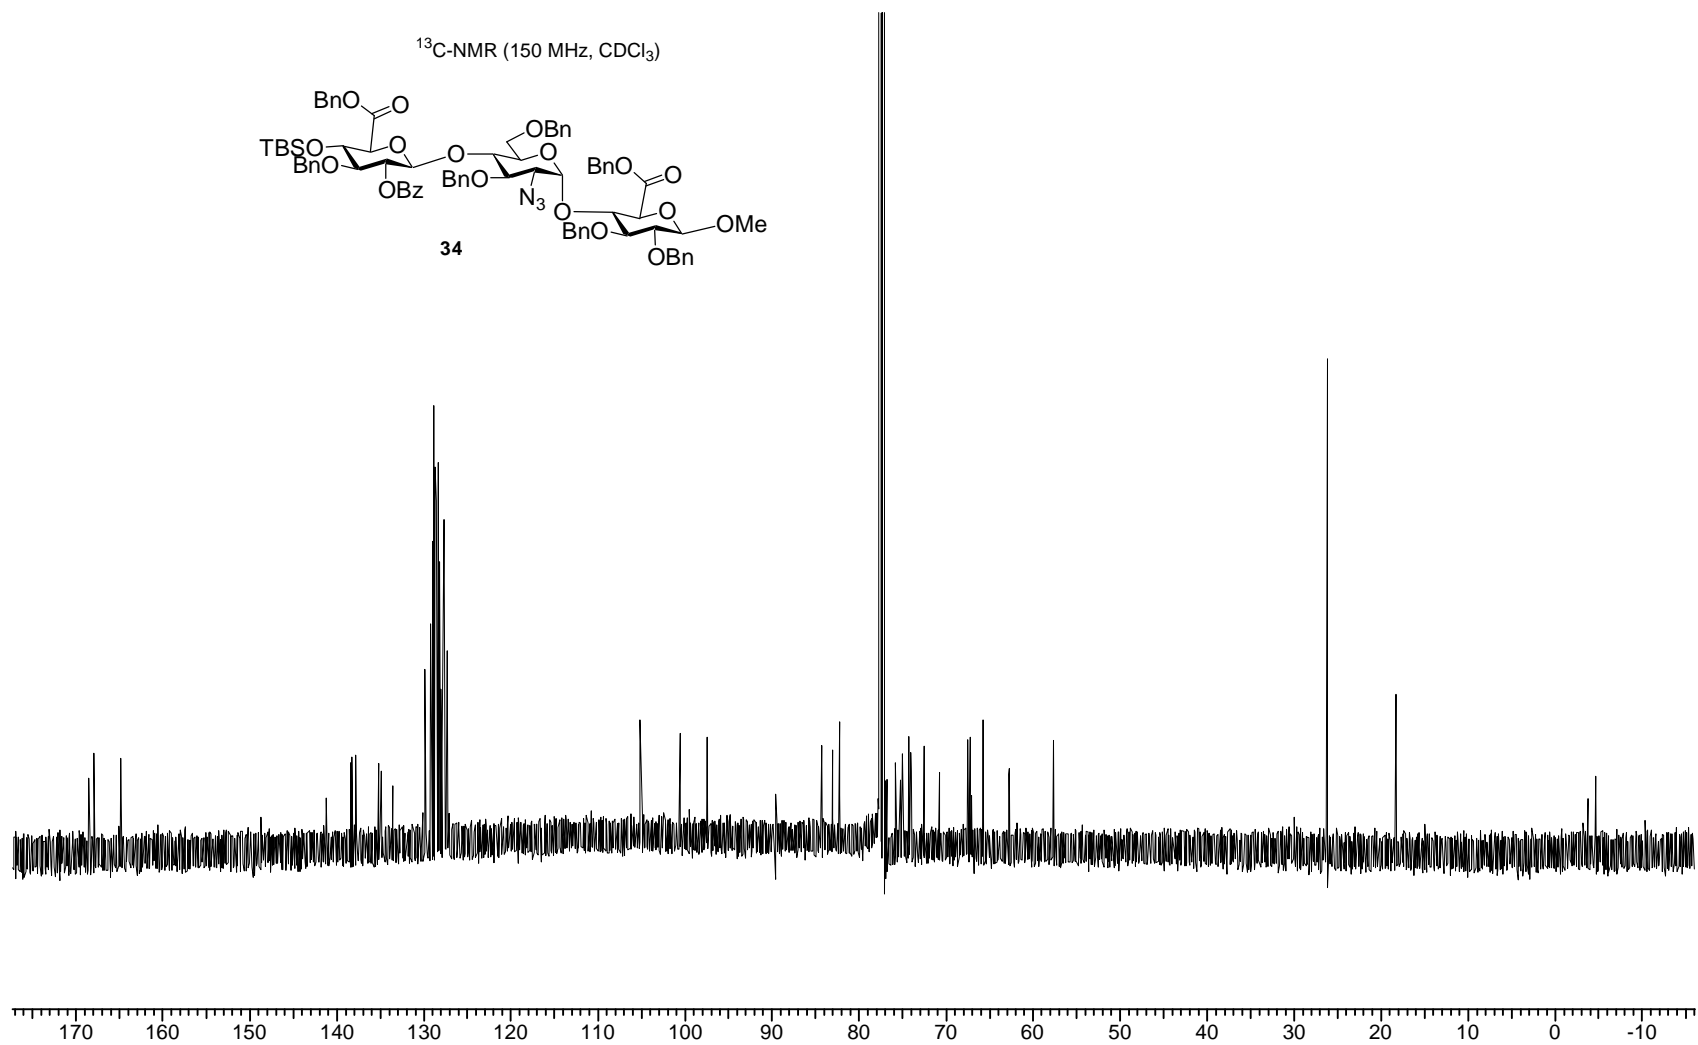

Supplement: NIHMS15042-supplement.pdf [file NIHMS15042-supplement.pdf]
